# Supplementary material for: Bis(chalcogenones) as pincer ligands: isolation and Heck activity of the selone-ligated unsymmetrical C,C,Se–Pd pincer complex
Source: Royal Society of Chemistry journal article supplement (doi:10.1039/c5dt01565k), 2015-01-01
Supplement: c5dt01565k1.pdf [file c5dt01565k1.pdf]

## Supporting Information

### **Bis(chalcogenones) as pincer ligands: Isolation and Heck activity of the selone-ligated unsymmetrical C,C,Se-Pd pincer complex**

Ninad Ghavale,<sup>a</sup> Sudesh T. Manjare,<sup>a,b</sup> Harkesh B. Singh\*<sup>a</sup> and Ray J. Butcher<sup>c</sup>

<sup>a</sup>*Department of Chemistry, Indian Institute of Technology Bombay, Mumbai 400076, India*

<sup>b</sup>*Department of Chemistry, University of Mumbai, Vidyanagari, Santacruz (E), Mumbai 400098, India*

<sup>c</sup>*Department of Chemistry, Howard University, Washington, D. C. 20059, United States*

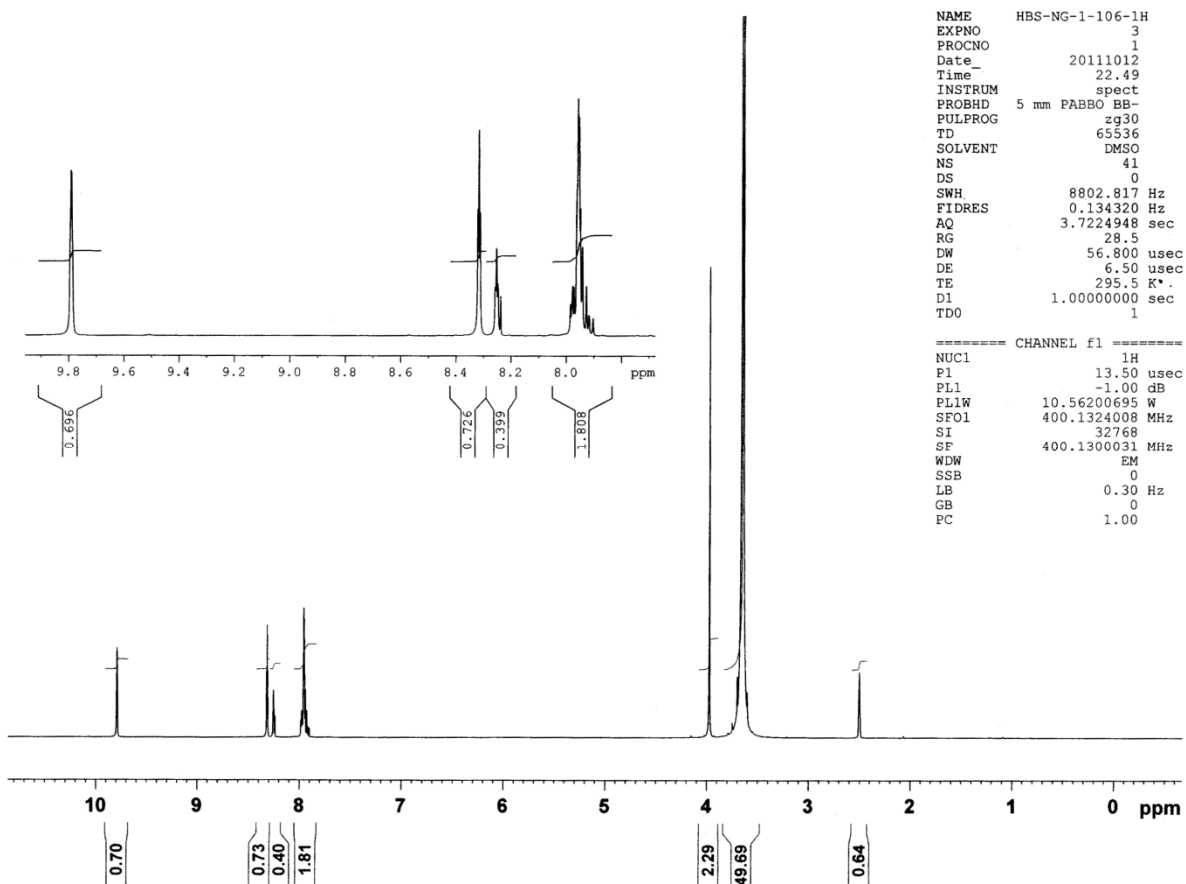

Figure 1.  $^1\text{H}$  NMR spectrum of **1**.

HBS-NG-1-106-13C

```
NAME      HBS-NG-1-106-13C
EXPNO     12
PROCNO    1
Date_     20111013
Time      0.09
INSTRUM   spect
PROBHD    5 mm PABBO BB-
PULPROG   zgpg30
TD         65536
SOLVENT   DMSO
NS         100
DS         4
SWH       24038.461 Hz
FIDRES    0.366798 Hz
AQ        1.3631988 sec
RG         2050
DW        20.800 usec
DE         6.50 usec
TE        295.7 K
D1        2.00000000 sec
D11       0.03000000 sec
TD0       1
```

===== CHANNEL f1 =====

```
NUC1      13C
F1        9.75 usec
PL1       -2.00 dB
PL1W     56.53121948 W
SFO1     100.6228298 MHz
```

===== CHANNEL f2 =====

```
CPDPRG2   waltz16
NUC2      1H
PCPD2     80.00 usec
PL2       -1.00 dB
PL12     14.50 dB
PL13     14.50 dB
PL2W     10.56200695 W
PL12W    0.29767781 W
PL13W    0.29767781 W
SFO2     400.1316005 MHz
SI        32768
SF       100.6127974 MHz
WDW       EM
SSB       0
LB        1.00 Hz
GB        0
PC        1.40
```

136.30  
135.67  
132.26  
124.78  
122.80  
121.01  
115.93

40.13  
39.92  
39.71  
39.50  
39.30  
39.09  
38.88  
36.90

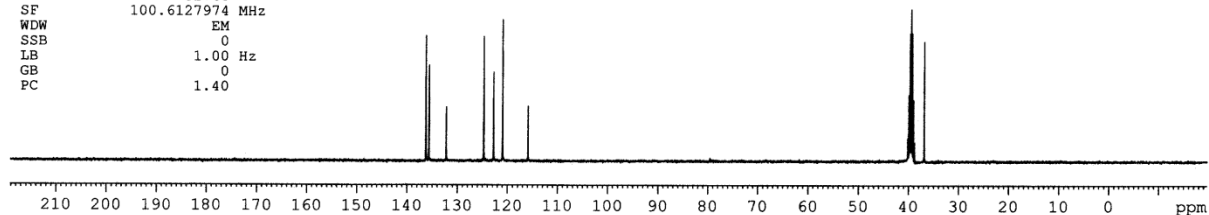

Figure 2.  $^{13}\text{C}$  NMR spectrum of **1**.

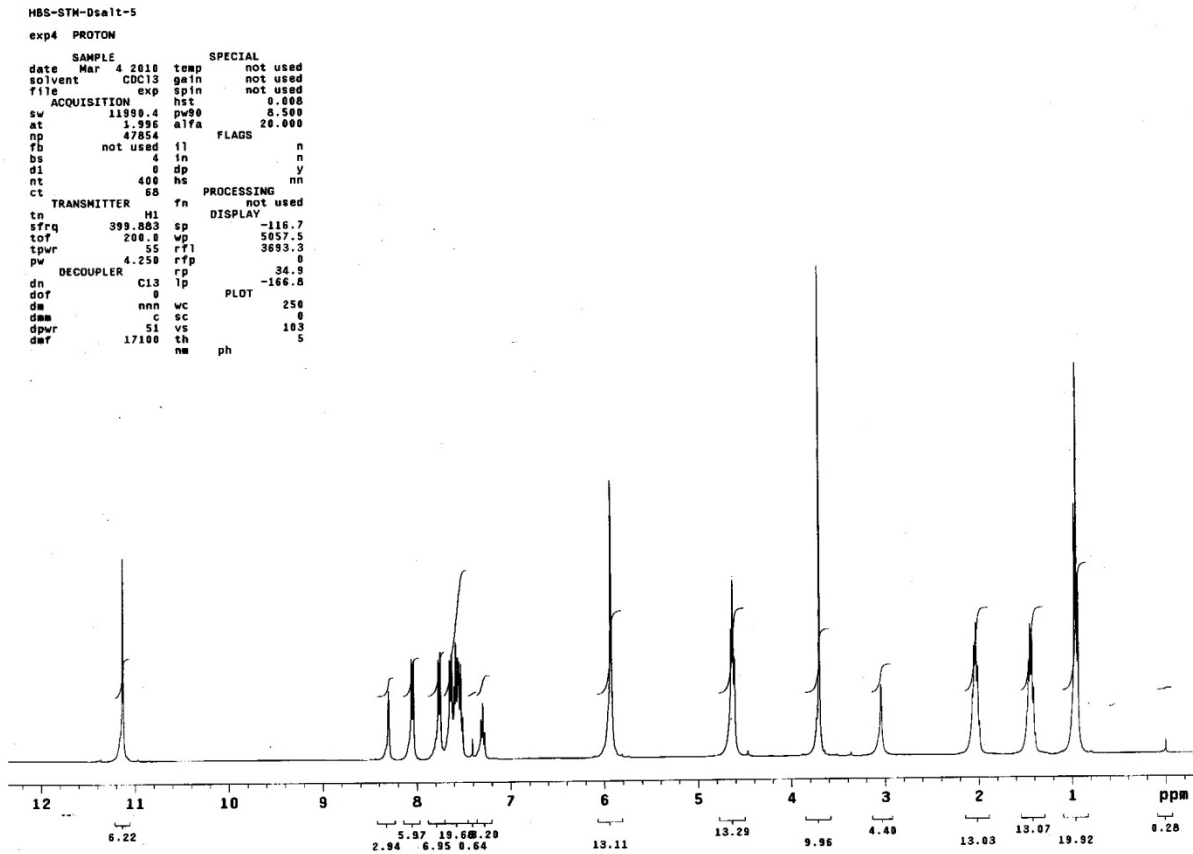

Figure 3.  $^1\text{H}$  NMR spectrum of **2**.

```

HBS-GTM-Osalt-5
exp4 CARBON
SAMPLE SPECIAL
date Mar 4 2010 temp not used
solvent CDCl3 gain not used
file exp spin not used
ACQUISITION hst 0.008
sw 25125.0 pw90 14.000
at 1.180 a1fa 26.000
np 60270 FLAGS
fb 13800 f1 n
bs 4 f2 n
d1 1.000 dp y
nt 640000 hs nn
ct 428
TRANSMITTER lb 1.00
tn C13 fn not used
sfrq 100.561 DISPLAY -262.1
tof 1554.3 sp
tpwr 56 wp 20602.3
pw 7.000 rft 9279.0
DECOUPLER rf1 7752.5
dn H1 rf2 81.0
dof -713.0 lp -308.6
dm yyy PLOT
dmw w wc 258
dpwr 41 sc 0
dwt 11900 vs 36
nm ph 9

```

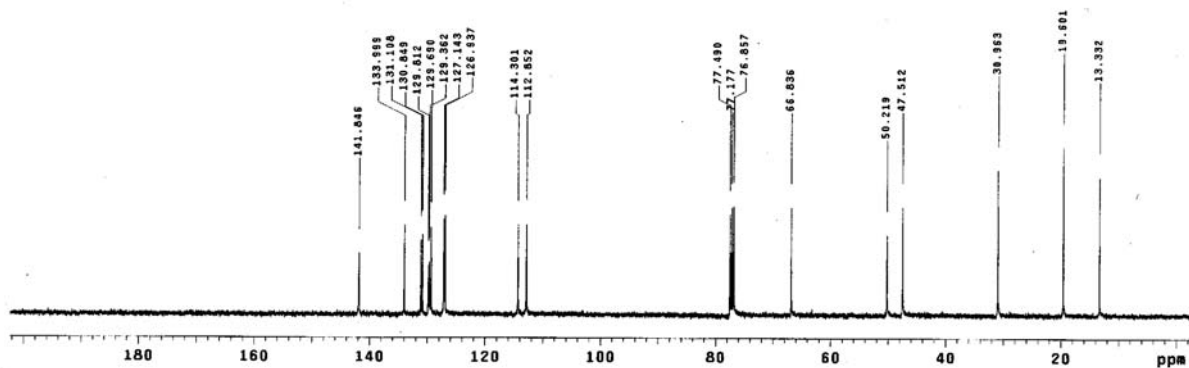

Figure 4.  $^{13}\text{C}$  NMR spectrum of **2**.

## Eager 300 Report

Page: 1 Sample: STM147 (STM147)

Method Name : SP310310  
Method File : D:\CHNS2008\SP310310.mth  
Chromatogram : STM147  
Operator ID : SP  
Analysed : 03/31/2010 12:09  
Sample ID : STM147 (# 7)  
Analysis Type : UnkNown (Area)

Company Name : C.E. Instruments  
Printed : 3/31/2010 15:46  
Instrument N. : Instrument #1  
Sample weight : .738

Calib. method : using 'K Factors'

!!! Warning missing one or more peaks.

| Element Name | %       | Ret.Time | Area    | BC | Area ratio | K factor    |
|--------------|---------|----------|---------|----|------------|-------------|
| Nitrogen     | 8.2429  | 43       | 76688   | RS | 14.851930  | .126064E+07 |
| Carbon       | 57.3574 | 66       | 1138965 | RS | 1.000000   | .268567E+07 |
| Hydrogen     | 6.0422  | 169      | 357826  | RS | 3.183013   | .691717E+07 |
| Totals       | 71.6425 |          | 1573479 |    |            |             |

Figure 5. Elemental analysis of 2.

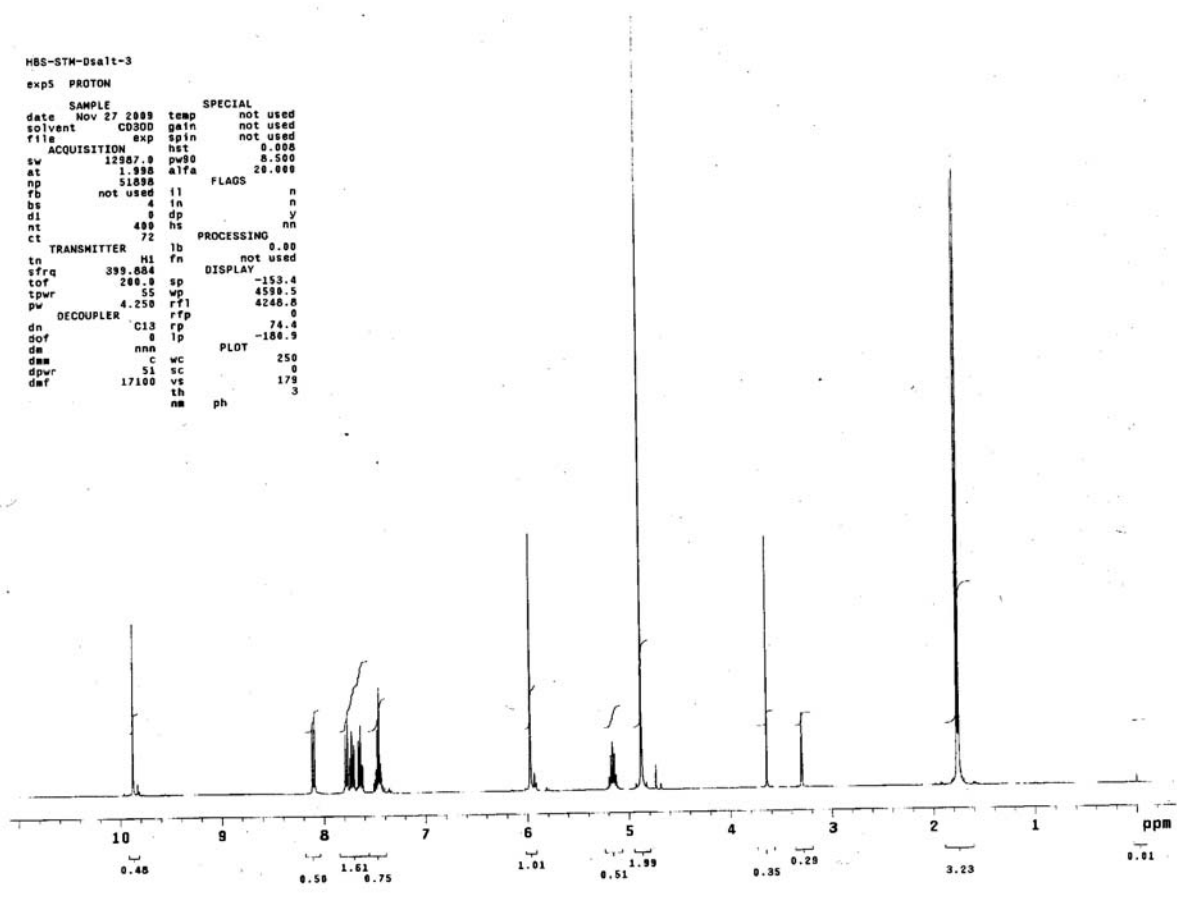

Figure 6. <sup>1</sup>H NMR spectrum of 3.

```

HBS-STM-Dsalt-3
exp4 CARBON
SAMPLE SPECIAL
date Nov 28 2009 temp not used
solvent CD3OD gain not used
file /export/home/~ spin not used
hbs/2009/NOV/HBS-- hst 0.000
STM-Dsalt-3-13C.f1- pw90 14.000
20.000
ACQUISITION d alpha FLAGS
sw 25125.6 f1 n
at 1.199 in n
np 60270 sp v
fb 13600 hs nn
bs 4
d1 1.000 fb PROCESSING 1.00
nt 40000 fn not used
ct 1236 DISPLAY
TRANSMITTER sp -192.9
tn C13 wp 18587.9
sfrq 100.621 rfl 6152.8
tof 1554.3 rfp 4937.0
tpwr 56 rp -154.3
pw 7.000 lp -321.0
DECOUPLER H1 wc PLOT 250
dn -713.0 sc 0
dm yyy vs 80
dmm w th 4
dpr 41 nm ph
dat 11900

```

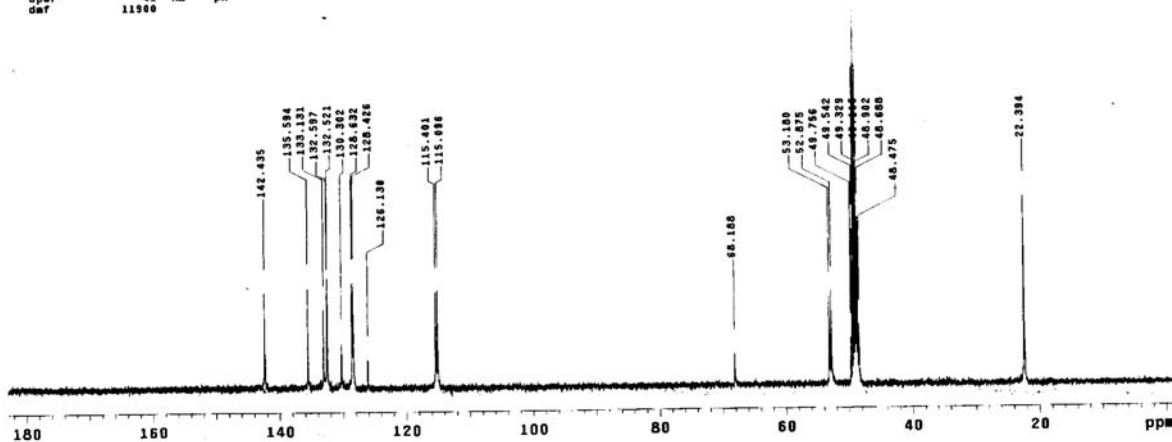

Figure 7.  $^{13}\text{C}$  NMR spectrum of **3**.



## Eager 300 Report

Page: 1 Sample: STM61 (STM61)

Method Name : SP111209  
Method File : D:\CHNS2008\SP111209.mth  
Chromatogram : STM61  
Operator ID : SP  
Analysed : 12/11/2009 14:04  
Sample ID : STM61 (# 23)  
Analysis Type : UnkNown (Area)

Company Name : C.E. Instruments  
Printed : 12/11/2009 16:55  
Instrument N. : Instrument #1  
Sample weight : .788

Calib. method : using 'K Factors'

!!! Warning missing one or more peaks.

| Element Name | %       | Ret.Time | Area    | BC | Area ratio | K factor    |
|--------------|---------|----------|---------|----|------------|-------------|
| 1            | 0.0000  | 18       | 10273   | RS |            | 0.0000      |
| Nitrogen     | 8.9889  | 42       | 84533   | RS | 12.283290  | .119342E+07 |
| Carbon       | 49.6985 | 66       | 1038338 | RS | 1.000000   | .265136E+07 |
| Hydrogen     | 4.2008  | 172      | 220379  | RS | 4.711599   | .616890E+07 |
| Totals       | 62.8882 |          | 1353522 |    |            |             |

Figure 8. Elemental analysis of 3.

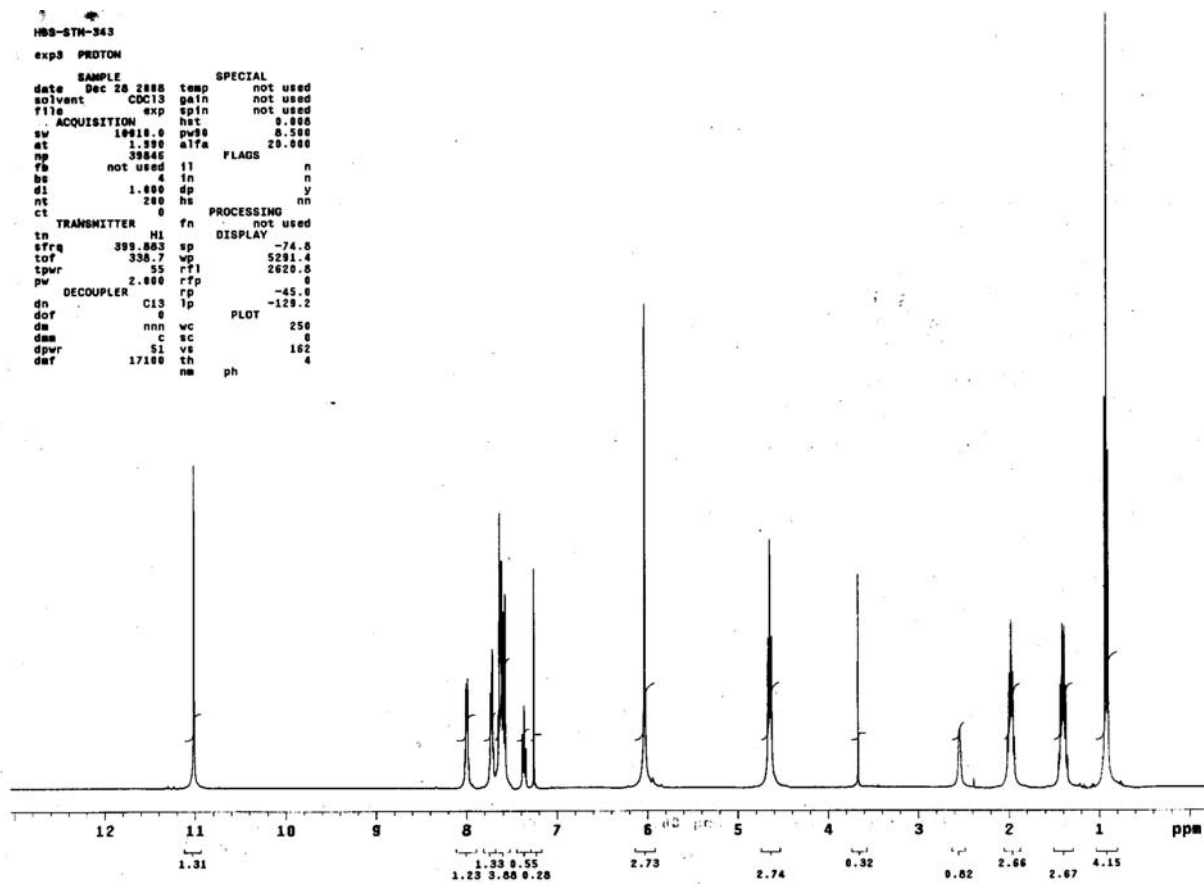

Figure 9.  $^1\text{H}$  NMR spectrum of **4**.

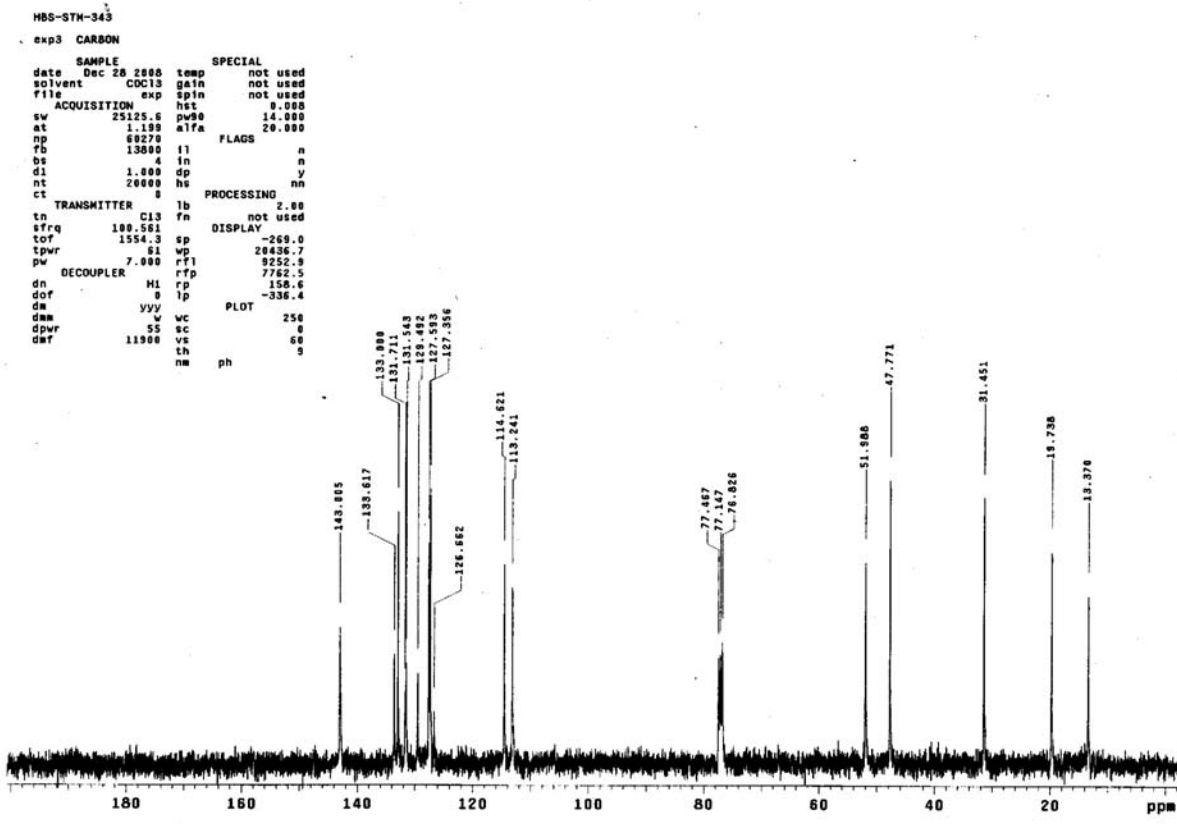

Figure 10.  $^{13}\text{C}$  NMR spectrum of 4.

# Eager 300 Report

Page: 1 Sample: STM343 (STM343)

Method Name : sp020109  
Method File : D:\CHNS2008\sp020109.mth  
Chromatogram : STM343  
Operator ID : SP  
Analysed : 01/02/2009 14:27  
Sample ID : STM343 (# 20)  
Analysis Type : UnkNown (Area)

Company Name : C.E. Instruments  
Printed : 1/5/2009 09:55  
Instrument N. : Instrument #1  
Sample weight : 1.653

Calib. method : using 'K Factors'

!!! Warning missing one or more peaks.

| Element Name | %       | Ret.Time | Area    | BC | Area ratio | K factor    |
|--------------|---------|----------|---------|----|------------|-------------|
| 1            | 0.0000  | 18       | 4015    | RS |            | 0.0000      |
| Nitrogen     | 8.1561  | 43       | 141748  | RS | 15.919730  | .105138E+07 |
| Carbon       | 50.7601 | 65       | 2256582 | RS | 1.000000   | .268556E+07 |
| Hydrogen     | 4.4929  | 172      | 532476  | RS | 4.237904   | .691806E+07 |
| Totals       | 63.4092 |          | 2934821 |    |            |             |

Figure 11. Elemental analysis of 4.

HBS-STM-79

exp4 PROTON

| SAMPLE      |             | SPECIAL    |          |
|-------------|-------------|------------|----------|
| date        | Dec 21 2009 | temp       | not used |
| solvent     | CD300       | gain       | not used |
| file        |             | spin       | not used |
| ACQUISITION |             | hst        | 0.000    |
| sv          | 12987.0     | pv90       | 0.500    |
| at          | 1.390       | alfa       | 20.000   |
| np          | 51000       | FLAGS      |          |
| fb          | not used    | l1         | n        |
| bs          | 4           | fn         | n        |
| d1          | 8           | dp         | y        |
| ot          | 400         | hs         | nn       |
| ct          | 92          | PROCESSING |          |
| TRANSMITTER |             | lb         | 0.00     |
| tn          | H1          | fn         | not used |
| sfrq        | 399.804     | DISPLAY    |          |
| tof         | 200.0       | sp         | -101.9   |
| tpwr        | 55          | wp         | 4573.4   |
| pw          | 4.250       | rf1        | 4248.8   |
| DECOUPLER   |             | rfp        | 0        |
| dn          | C13         | rp         | 01.0     |
| dof         | 0           | lp         | -178.5   |
| dm          | nnn         | PLOT       |          |
| dsm         | c           | wc         | 250      |
| dpwr        | 51          | sc         | 0        |
| dmt         | 17100       | vs         | 312      |
|             |             | th         | 4        |
|             |             | nm         | ph       |

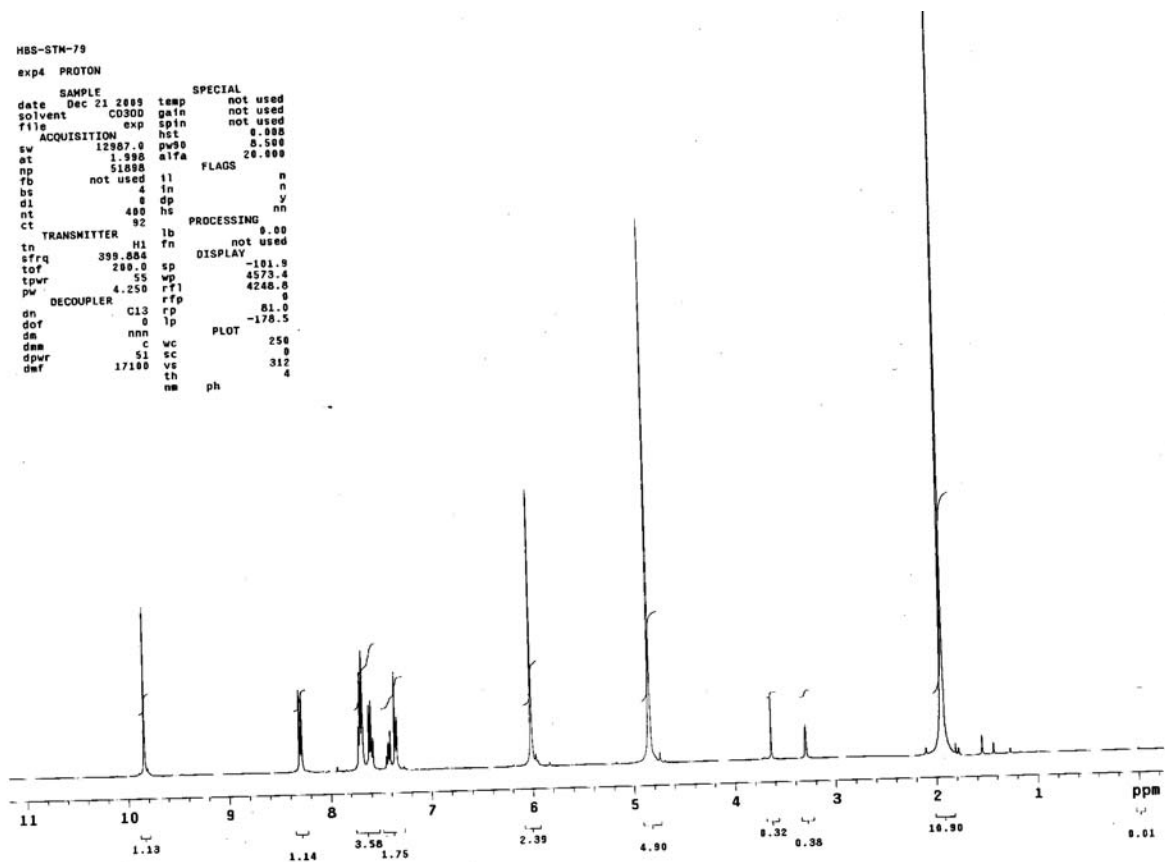

Figure 12.  $^1\text{H}$  NMR spectrum of **5**.

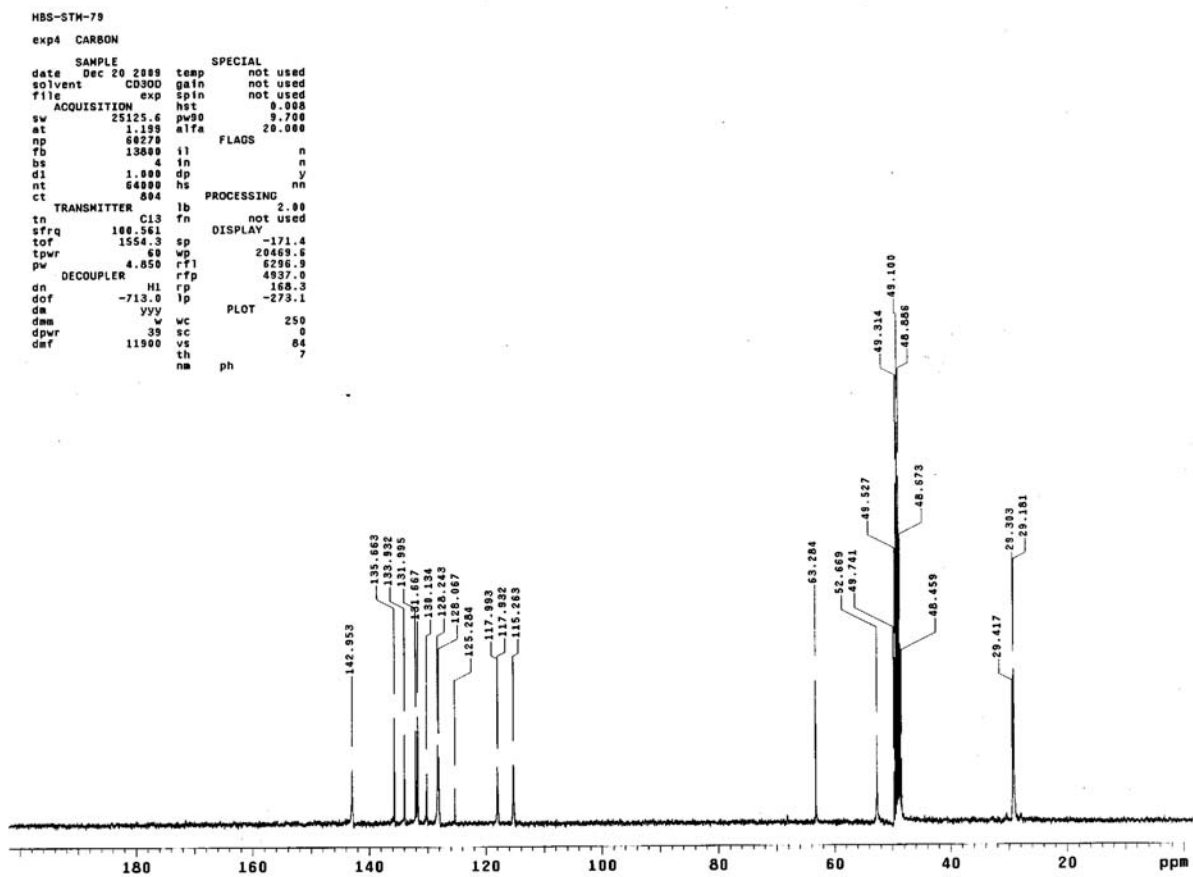

Figure 13. <sup>13</sup>C NMR spectrum of 5.

# Eager 300 Report

Page: 1 Sample: STM79 (STM79)

Method Name : SP200110  
Method File : D:\CHNS2008\SP200110.mth  
Chromatogram : STM79  
Operator ID : SP  
Analysed : 01/20/2010 15:09  
Sample ID : STM79 (# 32)  
Analysis Type : UnkNown (Area)

Company Name : C.E. Instruments  
Printed : 1/29/2010 16:41  
Instrument N. : Instrument #1  
Sample weight : .546

Calib. method : using 'K Factors'

!!! Warning missing one or more peaks.

| Element Name | %       | Ret.Time | Area   | BC | Area ratio | K factor    |
|--------------|---------|----------|--------|----|------------|-------------|
| Nitrogen     | 8.5459  | 44       | 56745  | RS | 12.988510  | .121612E+07 |
| Carbon       | 50.7847 | 67       | 737033 | RS | 1.000000   | .265804E+07 |
| Hydrogen     | 4.4613  | 175      | 165066 | RS | 4.465081   | .612939E+07 |
| Totals       | 63.7919 |          | 958844 |    |            |             |

Figure 14. Elemental analysis of 5.

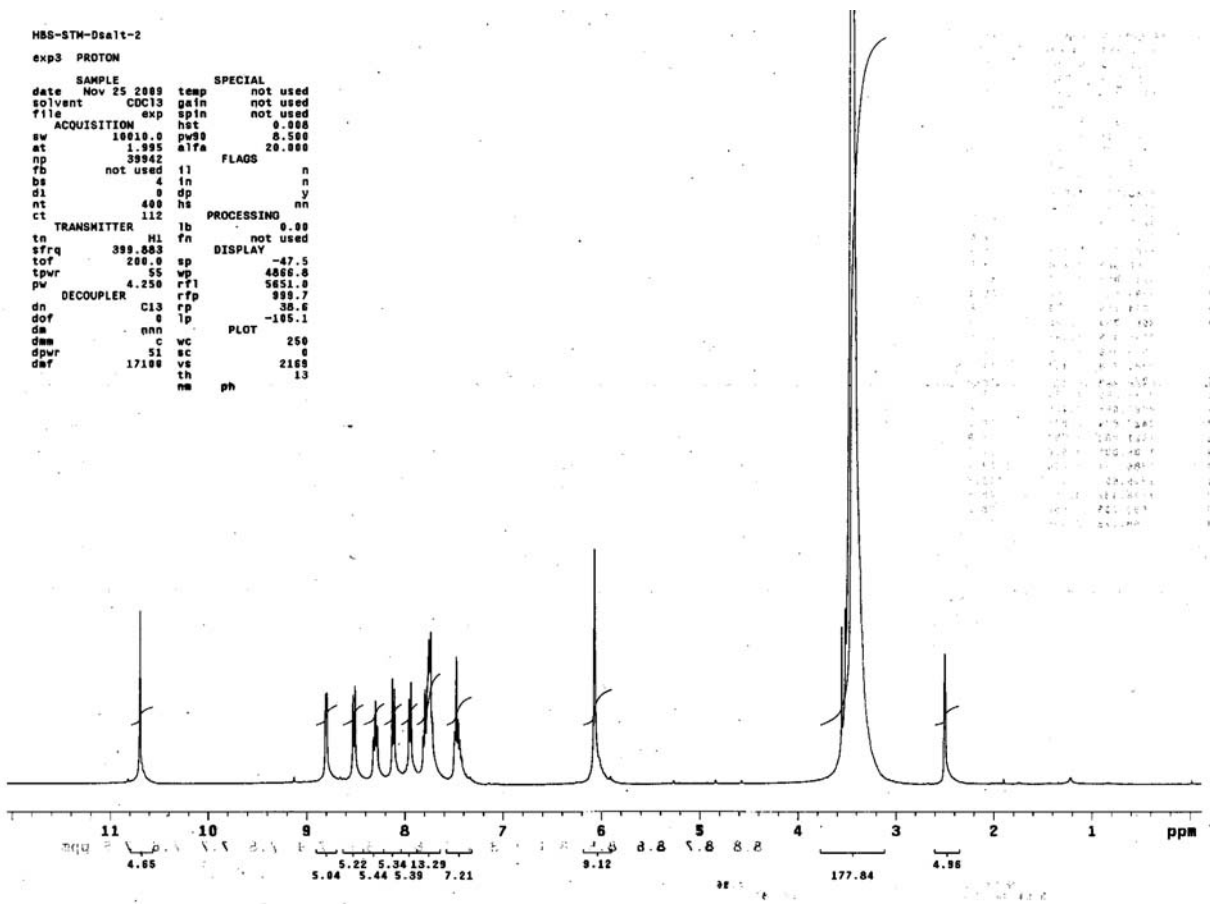

Figure 15.  $^1\text{H}$  NMR spectrum of **6**.



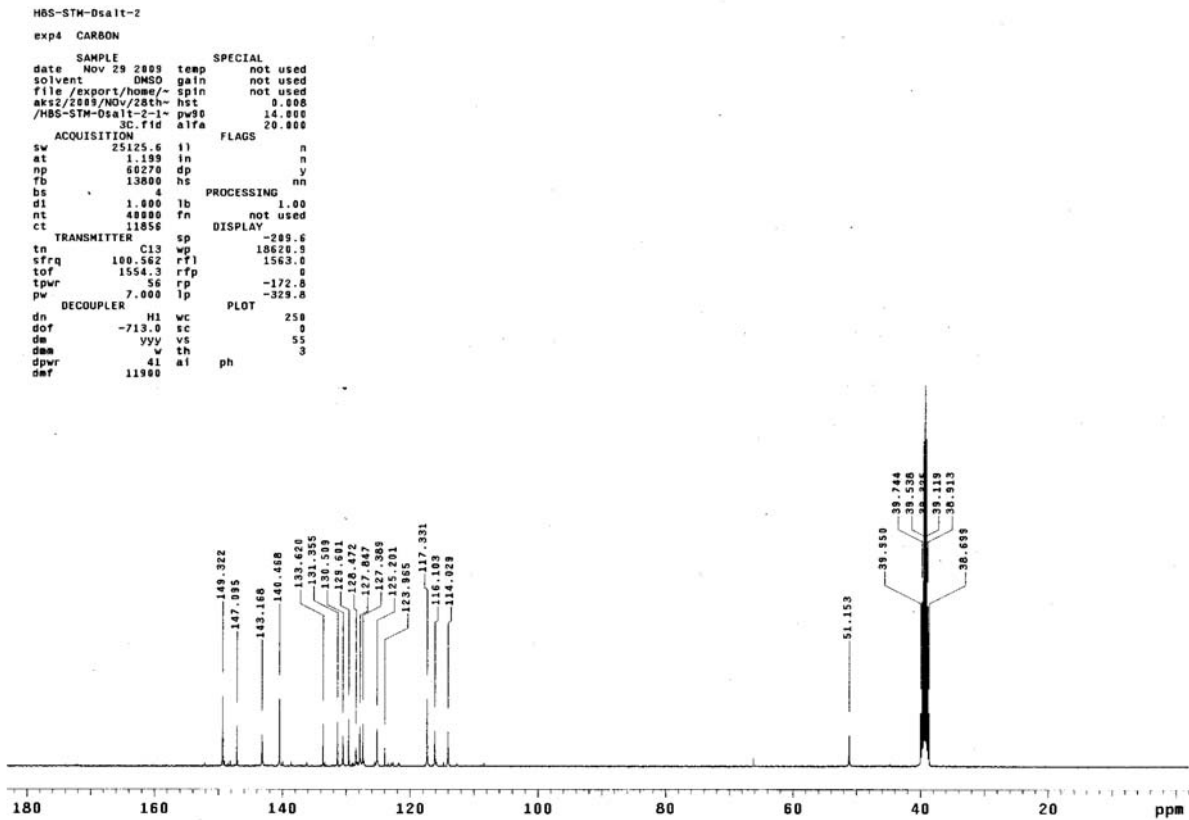

Figure 16.  $^{13}\text{C}$  NMR spectrum of **6**.

# Eager 300 Report

Page: 1 Sample: STM55 (STM55)

Method Name : SP111209  
Method File : D:\CHNS2008\SP111209.mth  
Chromatogram : STM55  
Operator ID : SP Company Name : C.E. Instruments  
Analysed : 12/11/2009 14:14 Printed : 12/11/2009 16:55  
Sample ID : STM55 (# 24) Instrument N. : Instrument #1  
Analysis Type : UnkNown (Area) Sample weight : .679

Calib. method : using 'K Factors'

!!! Warning missing one or more peaks.

| Element Name | %       | Ret.Time | Area    | BC | Area ratio | K factor    |
|--------------|---------|----------|---------|----|------------|-------------|
| 1            | 0.0000  | 18       | 10223   | RS |            | 0.0000      |
| Nitrogen     | 12.5421 | 42       | 101632  | RS | 9.169681   | .119342E+07 |
| Carbon       | 51.7662 | 66       | 931933  | RS | 1.000000   | .265136E+07 |
| Hydrogen     | 2.9200  | 175      | 138485  | RS | 6.729487   | .616890E+07 |
| Totals       | 67.2283 |          | 1182273 |    |            |             |

Figure 17. Elemental analysis of 6.

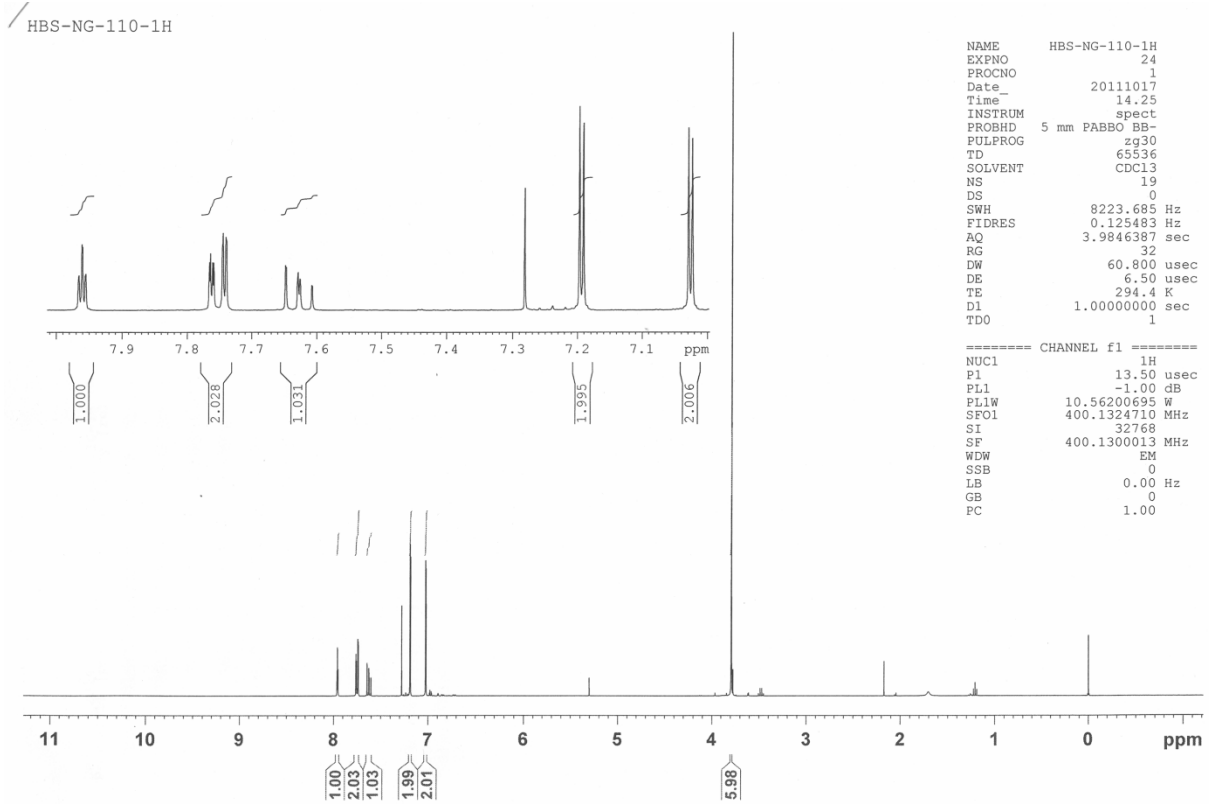

Figure 18. <sup>1</sup>H NMR spectrum of **7** in CDCl<sub>3</sub>.

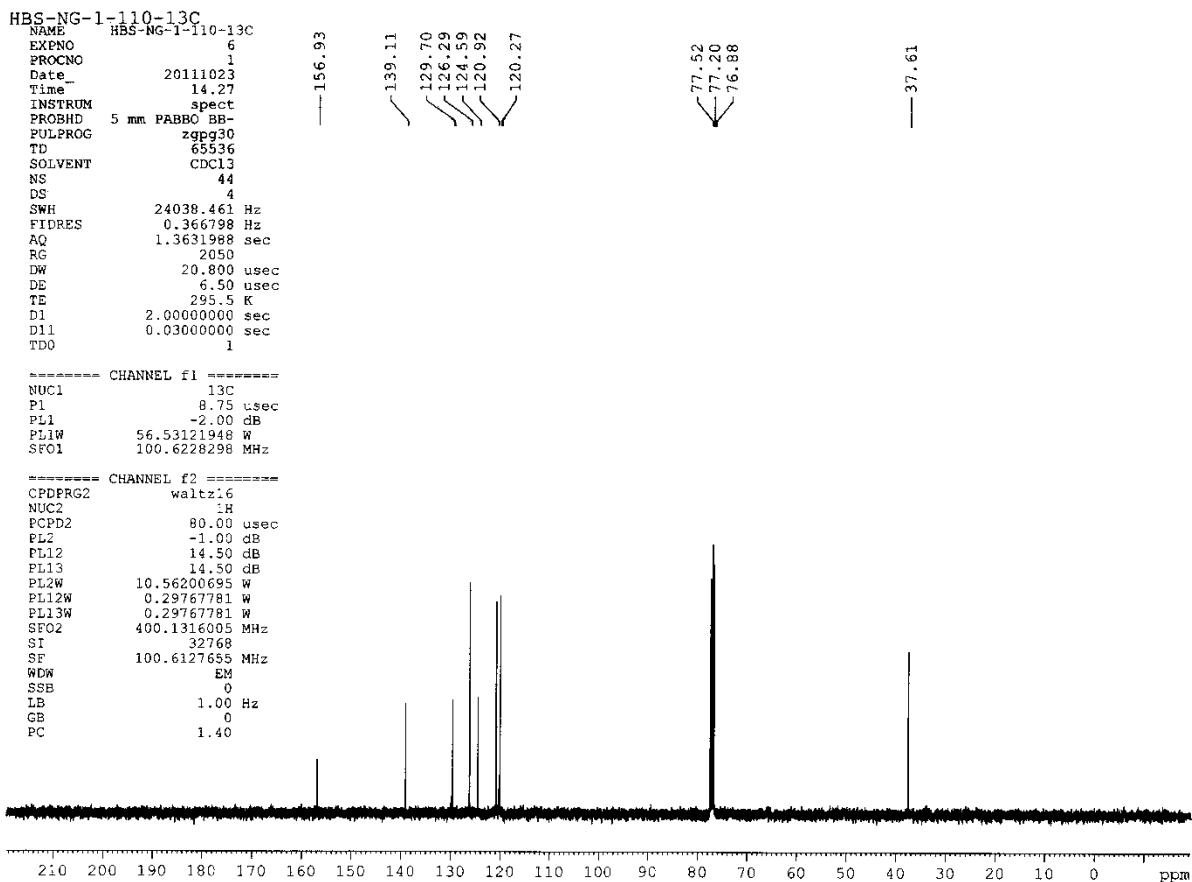

Figure 19.  $^{13}\text{C}$  NMR spectrum of **7** in  $\text{CDCl}_3$ .

HBS-NG-1-110-77Se

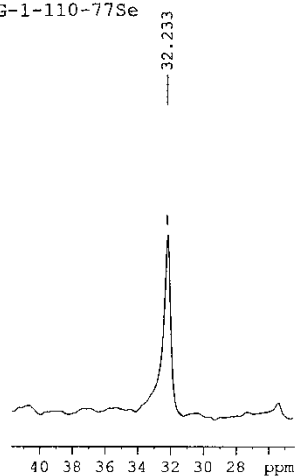

NAME HBS-NG-1-110-77Se  
EXPNO 7  
PROCNO 1  
Date\_ 20111023  
Time 14.36  
INSTRUM spect  
PROBHD 5 mm PABBO BB-  
PULPROG zg  
TD 65536  
SOLVENT CDC13  
NS 111  
DS 4  
SWH 300000.000 Hz  
FIDRES 4.577637 Hz  
AQ 0.1092767 sec  
RG 228  
DW 1.667 usec  
DE 6.50 usec  
TE 295.0 K  
D1 1.0000000 sec  
TD0 1

===== CHANNEL f1 =====  
NUC1 77Se  
P1 10.00 usec  
PL1 0.00 dB  
SFO1 76.3490004 MHz  
SI 65536  
SF 76.3110246 MHz  
WDW EM  
SSB 0  
LB 30.00 Hz  
GB 0  
PC 0.10

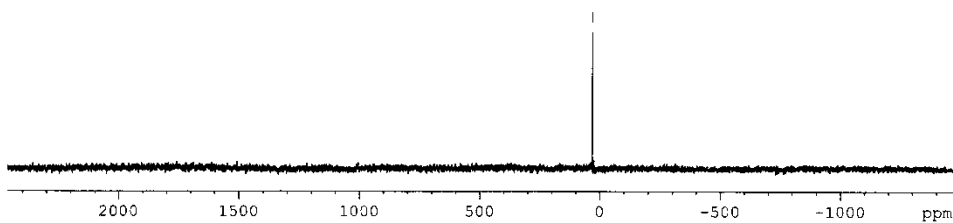

Figure 20.  $^{77}\text{Se}$  NMR spectrum of **7** in  $\text{CDCl}_3$ .

# Eager 300 Report

Page: 1 Sample: NG-1-110 (NG-1-110)

Method Name : SD111111  
Method File : D:\CHNS2011\SD111111.mth  
Chromatogram : NG-1-110  
Operator ID : SD Company Name : C.E. Instruments  
Analysed : 11/11/2011 14:12 Printed : 11/11/2011 17:13  
Sample ID : NG-1-110 (# 16) Instrument N. : Instrument #1  
Analysis Type : UnkNown (Area) Sample weight : .704

Calib. method : using 'K Factors'

!!! Warning missing one or more peaks.

| Element Name | %       | Ret.Time | Area   | BC | Area ratio | K factor    |
|--------------|---------|----------|--------|----|------------|-------------|
| Nitrogen     | 14.6766 | 44       | 80465  | RS | 9.268458   | .146976E+07 |
| Carbon       | 42.4441 | 68       | 745787 | RS | 1.000000   | .249589E+07 |
| Hydrogen     | 3.5628  | 190      | 84980  | RS | 8.776024   | .496282E+07 |
| Totals       | 60.6835 |          | 911232 |    |            |             |

Figure 21. Elemental analysis of 7.

**Single Mass Analysis**

Tolerance = 10.0 PPM / DBE: min = -1.5, max = 50.0

Isotope cluster parameters: Separation = 1.0 Abundance = 1.0%

Monoisotopic Mass, Odd and Even Electron Ions

28 formula(e) evaluated with 1 results within limits (up to 50 closest results for each mass)

Micromass : Q-ToF micro (YA-105)

Dept. Of Chemistry I.I.T.(B)

21-Sep-2011 11:18:18

C<sub>14</sub>H<sub>14</sub>N<sub>4</sub>Se<sub>2</sub>

HBS-NG-1-82 21 (0.207) AM (Cen,5, 80.00, HI,5000.0,556.28,1.00); Sm (Mn, 2x4.00); Sb (5,40.00); Cm (1:45)

TOF MS ES+  
1.26e3

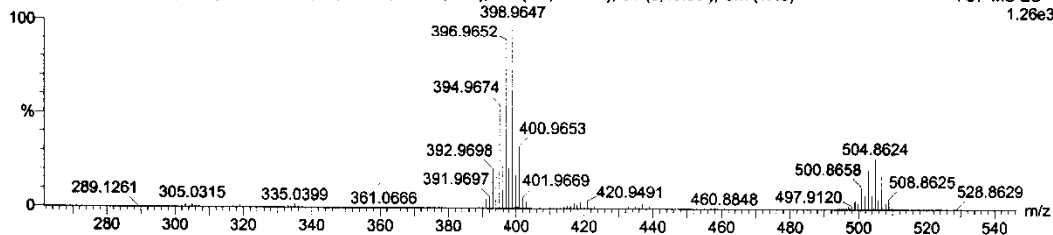

Minimum:

-1.5

Maximum:

200.0

10.0

50.0

| Mass     | Calc. Mass | mDa | PPM | DBE  | Score | Formula                                                        |
|----------|------------|-----|-----|------|-------|----------------------------------------------------------------|
| 398.9647 | 398.9627   | 1.9 | 4.9 | 11.5 | 1     | C <sub>14</sub> H <sub>15</sub> N <sub>4</sub> Se <sub>2</sub> |

Figure 22. Mass spectrum of 7.

```

HBS-37H-149
exp4 PROTON
SAMPLE SPECIAL
date Mar 2 2010 temp not used
solvent CDCL3 gain not used
file exp spin not used
ACQUISITION hst 8.888
sw 11898.4 pw98 8.588
at 1.396 a17a 28.088
np 47054
fb not used il FLAGS n
bs 4 in n
d1 0 dp y
nt 480 hs nn
ct 80
TRANSMITTER fn PROCESSING
tn H1 fn not used
sfrq 389.063 sp DISPLAY -123.7
tof 288.8 wp 4222.5
tpwr 55 rf1 3747.5
pw 4.258 rfp 8
DECOUPLER rp 36.1
dn C13 lp -168.9
dof s PLOT
ds nnn wc 250
dss c sc 8
dpwr S1 vs 74
dof 17188 nm ph 5

```

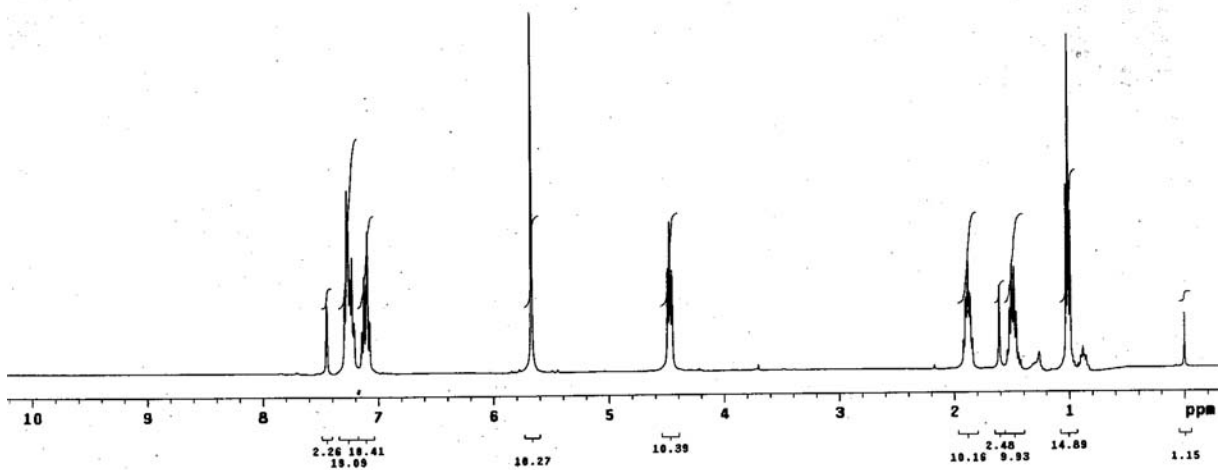

Figure 23. <sup>1</sup>H NMR spectrum of **8**.



HBS-STN-149

exp4 CARBON

| SAMPLE             |                | SPECIAL |          |
|--------------------|----------------|---------|----------|
| date_              | Mar 3 2010     | temp    | not used |
| solvent            | CDCl3          | gain    | not used |
| file_              | /export/home/~ | spin    | not used |
| hbez/              | 2010/March/16- | hst     | 0.000    |
| t/HBS-STN-149-13C- | pv90           |         | 14.000   |
|                    | fid            | atfa    | 20.000   |

  

| ACQUISITION |         | FLAGS |          |
|-------------|---------|-------|----------|
| sw          | 25125.6 | l1    | n        |
| at          | 1.189   | ln    | n        |
| np          | 68270   | dp    | y        |
| fb          | 13000   | hs    | nn       |
| bs          | 4       |       |          |
| dl          | 1.000   | fn    | not used |
| nt          | 640000  |       |          |
| ct          | 12960   | sp    | -170.1   |

  

| TRANSMITTER |         | DISPLAY |         |
|-------------|---------|---------|---------|
| tn          | C13     | wp      | 20370.7 |
| sfrq        | 100.621 | rfl     | 9252.0  |
| tof         | 1554.3  | rtp     | 7762.5  |
| tpwr        | 56      | rp      | 34.2    |
| pw          | 7.000   | lp      | -332.2  |

  

| DECOUPLER |        | PLOT |     |
|-----------|--------|------|-----|
| dn        | H1     | wc   | 250 |
| dof       | -713.8 | vs   | 0   |
| dm        | yyy    | th   | 39  |
| dwm       | w      | nm   | 5   |
| dpr       | 41     | ph   |     |
| dat       | 11900  |      |     |

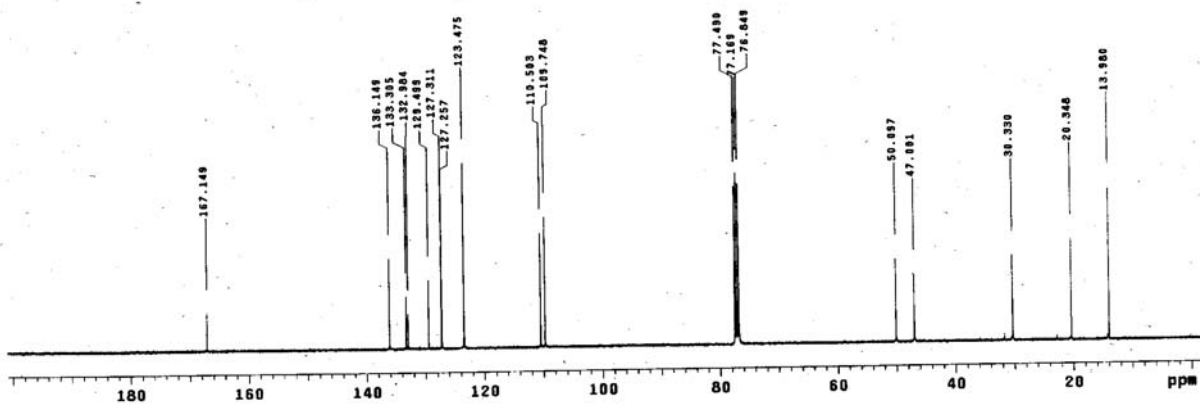

Figure 24. <sup>13</sup>C NMR spectrum of 8.

```

HBS-STW-2-14#
exp1 s2pu1
SAMPLE
date Mar 30 2010 dn DEC. & VT H1
solvent CDCl3 dof 0
file exp dm nnn
ACQUISITION dmf c
sfrq 57.219 dmf 200
tn Se77 PROCESSING
at 0.640 lb 10.00
np 128000 fn not used
sw 100000.0
fb 55000 werr
bs 6 wexp
pw 3.0 wbs
pwr 3.0 wnt
tpwr 58
di 0 sp DISPLAY
lof -1200.0 wp -35753.1
nt 32000 vs 9998.5
ct 528 sc 22
alock n wc 0
gain 6 hz 250
FLAGS n rff 488281.25
in n rfp 35754.6
dp y th 0
ins 65.734
nm ph

```

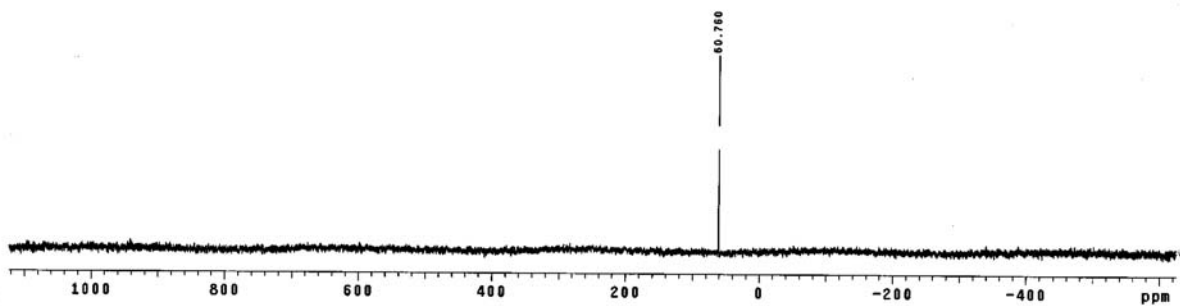

Figure 25.  $^{77}\text{Se}$  NMR spectrum of **8**.

## Eager 300 Report

Page: 1 Sample: STM149 (STM149)

Method Name : SP240310  
Method File : D:\CHNS2008\SP240310.mth  
Chromatogram : STM149  
Operator ID : SP  
Analysed : 03/24/2010 12:28  
Sample ID : STM149 (# 12)  
Analysis Type : UnkNown (Area)

Company Name : C.E. Instruments  
Printed : 3/24/2010 16:27  
Instrument N. : Instrument #1  
Sample weight : .658

Calib. method : using 'K Factors'

!!! Warning missing one or more peaks.

| Element Name | %       | Ret.Time | Area    | BC | Area ratio | K factor    |
|--------------|---------|----------|---------|----|------------|-------------|
| Nitrogen     | 9.9591  | 44       | 80425   | RS | 13.217620  | .122729E+07 |
| Carbon       | 59.8100 | 67       | 1063027 | RS | 1.000000   | .270113E+07 |
| Hydrogen     | 5.4894  | 169      | 309545  | RS | 3.434160   | .713951E+07 |
| Totals       | 75.2584 |          | 1452997 |    |            |             |

Figure 26. Elemental analysis of 8.

**Elemental Composition Report**

**Single Mass Analysis (displaying only valid results)**

Tolerance = 5.0 PPM / DBE: min = -1.5, max = 50.0

Isotope cluster parameters: Separation = 1.0 Abundance = 1.0%

Monoisotopic Mass, Odd and Even Electron Ions

12 formula(e) evaluated with 1 results within limits (up to 50 closest results for each mass)

Micromass : Q-Tof micro (YA-105)

Dept. Of Chemistry I.I.T.(B)

12-May-201110:35:24

C30H34N4Se2

HBS-STM-2-149 1 (0.010) AM (Cen,5, 80.00, Ht,5000.0,556.28,1.00); Sm (SG, 3x6.00); Cm (1:33)

TOF MS ES+  
5.83e3

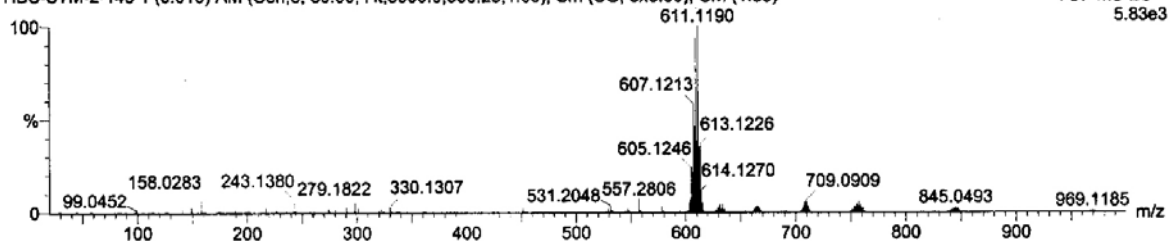

Minimum: -1.5  
Maximum: 200.0 5.0 50.0

| Mass     | Calc. Mass | mDa  | PPM  | DBE  | Score | Formula         |
|----------|------------|------|------|------|-------|-----------------|
| 611.1190 | 611.1192   | -0.2 | -0.3 | 17.5 | 1     | C30. H35 N4 Se2 |

Figure 27. Mass spectrum of 8.

HBS-STH-2-319

exp4 PROTON

| SAMPLE      |             | SPECIAL |          |
|-------------|-------------|---------|----------|
| date        | Dec 14 2010 | temp    | not used |
| solvent     | CDCl3       | gain    | not used |
| file        |             | spin    | not used |
| ACQUISITION |             | exp     | hst      |
| sw          | 10010.0     | pw90    | 0.000    |
| at          | 1.995       | alpha   | 8.500    |
| np          | 39962       | alpha   | 28.000   |
| fb          | not used    | fl      | n        |
| bs          | 4           | in      | n        |
| d1          | 0           | dp      | y        |
| nt          | 400         | hs      | nn       |
| ct          | 76          | fn      | not used |
| TRANSMITTER |             | DISPLAY |          |
| tn          | H1          | sp      | -123.7   |
| sfrq        | 399.883     | wp      | 4222.2   |
| tof         | 280.0       | rfl     | 2754.3   |
| tpwr        | 55          | rfl     | 0        |
| pw          | 4.250       | rfl     | 21.1     |
| DECOUPLER   |             | rp      | -135.2   |
| dn          | C13         | lp      |          |
| dot         | 0           | plot    | 250      |
| dm          | nnh         | vc      | 0        |
| dsw         | c           | sc      | 0        |
| dpwr        | 51          | vs      | 101      |
| dwt         | 17100       | th      | 9        |
|             | nm          | ph      |          |

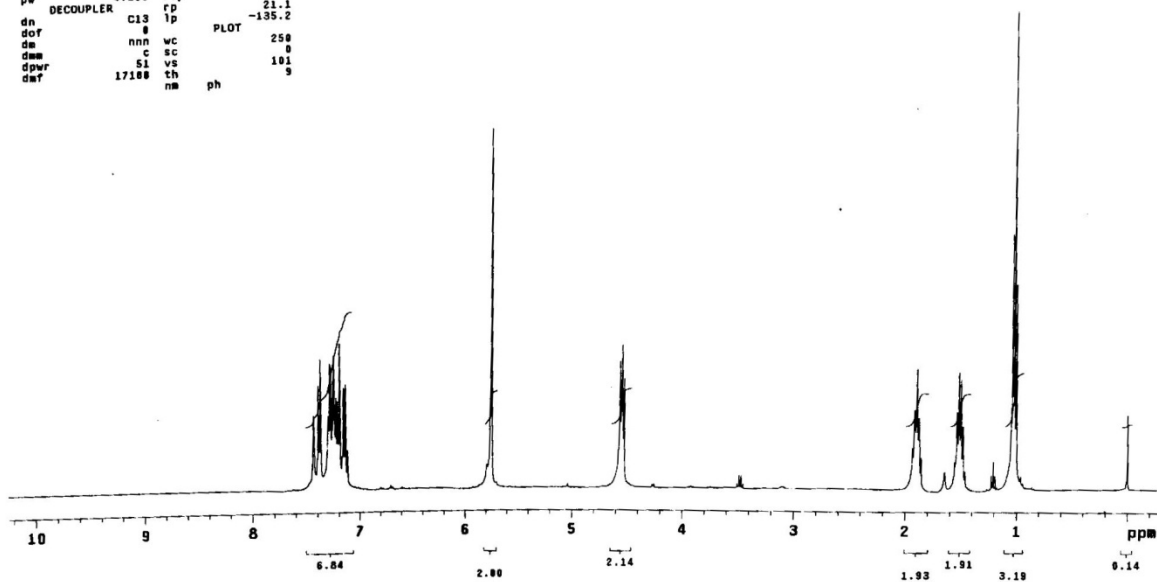

Figure 28.  $^1\text{H}$  NMR spectrum of **9**.

HBS-STM-2-329-13C

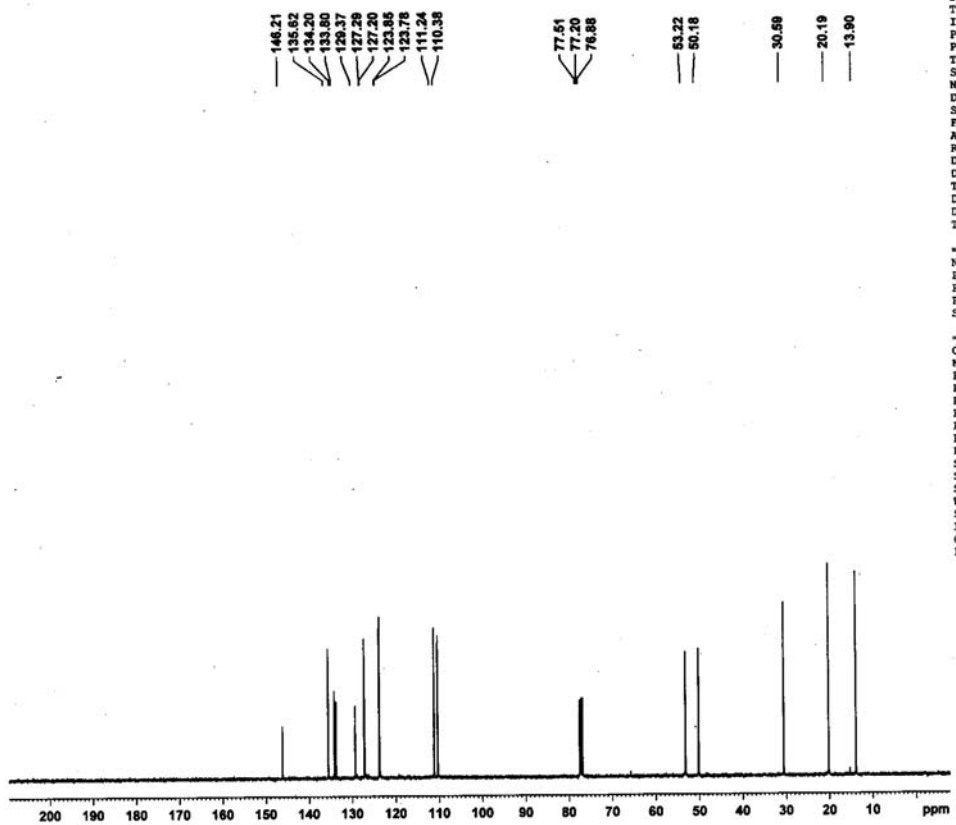

```
NAME      HBS-STM-2-329-13C
EXPNO     29
PROCNO     1
Date_     20101220
Time      14.59
INSTRUM    spect
PROBHD     5 mm PABBO BB-
PULPROG    zgpg30
TD         65536
SOLVENT    CDCl3
NS         185
DS         4
SWH        28409.092 Hz
FIDRES     0.433488 Hz
AQ         1.1534836 sec
RG         2050
DW         17.600 usec
DE         6.50 usec
TE         294.2 K
D1         1.00000000 sec
D11        0.03000000 sec
TDO        1

----- CHANNEL f1 -----
NUC1       13C
P1         8.75 usec
PL1        -2.00 dB
PL1W       56.53121948 W
SFO1       100.6238364 MHz

----- CHANNEL f2 -----
CPDPRG2    waltz16
NUC2       1H
PCPD2      80.00 usec
PL2         -1.00 dB
PL12       14.50 dB
PL13       14.50 dB
PL2W       10.56200695 W
PL12W      0.29767781 W
PL13W      0.29767781 W
SFO2       400.1316005 MHz
SI         32768
SF         100.6127757 MHz
WDW        EM
SSB        0
LB         1.00 Hz
GB         0
PC         1.40
```

Figure 29. <sup>13</sup>C NMR spectrum of **9**.

HBS-STM-2-329-Te125

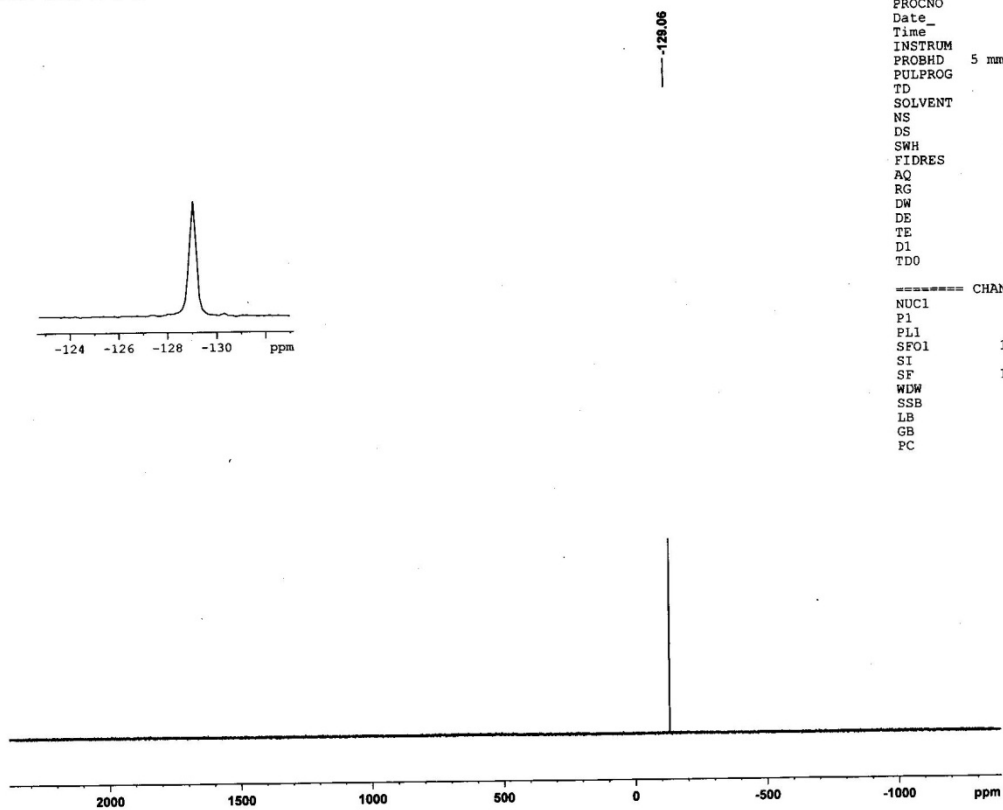

Figure 30.  $^{125}\text{Te}$  NMR spectrum of **9**.

**Single Mass Analysis (displaying only valid results)**

Tolerance = 5.0 PPM / DBE: min = -1.5, max = 50.0

Isotope cluster parameters: Separation = 1.0 Abundance = 1.0%

Monoisotopic Mass, Odd and Even Electron Ions

25 formula(e) evaluated with 1 results within limits (up to 50 closest results for each mass)

Micromass : Q-ToF micro (YA-105)

Dept. Of Chemistry I.I.T.(B)

12-May-2011 11:30:09

C<sub>30</sub>H<sub>34</sub>N<sub>4</sub>Te<sub>2</sub>

HBS-STM-2-329 47 (0.470) AM (Cen,5, 80.00, Ar,5000.0,556.28,1.00); Cm (34:50)

TOF MS ES+  
1.04e3

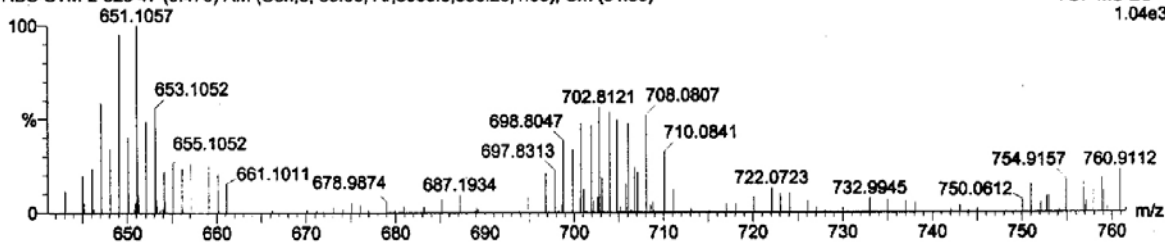

Minimum: -1.5  
Maximum: 200.0 5.0 50.0

| Mass     | Calc. Mass | mDa | PPM | DBE  | Score | Formula                                                        |
|----------|------------|-----|-----|------|-------|----------------------------------------------------------------|
| 711.0993 | 711.0986   | 0.7 | 0.9 | 15.5 | 1     | C <sub>30</sub> H <sub>35</sub> N <sub>4</sub> Te <sub>2</sub> |

Figure 31. Mass spectrum of 9.



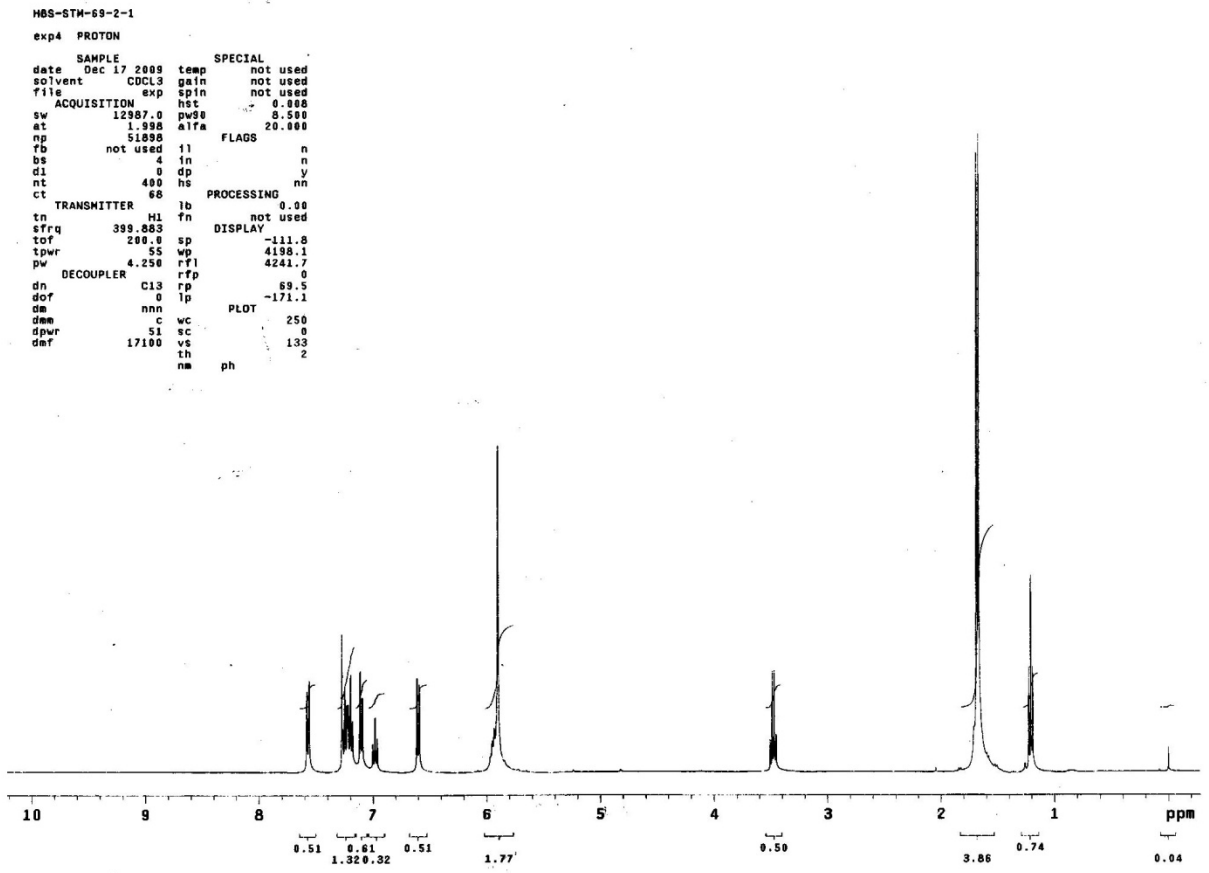

Figure 32. <sup>1</sup>H NMR spectrum of 10.

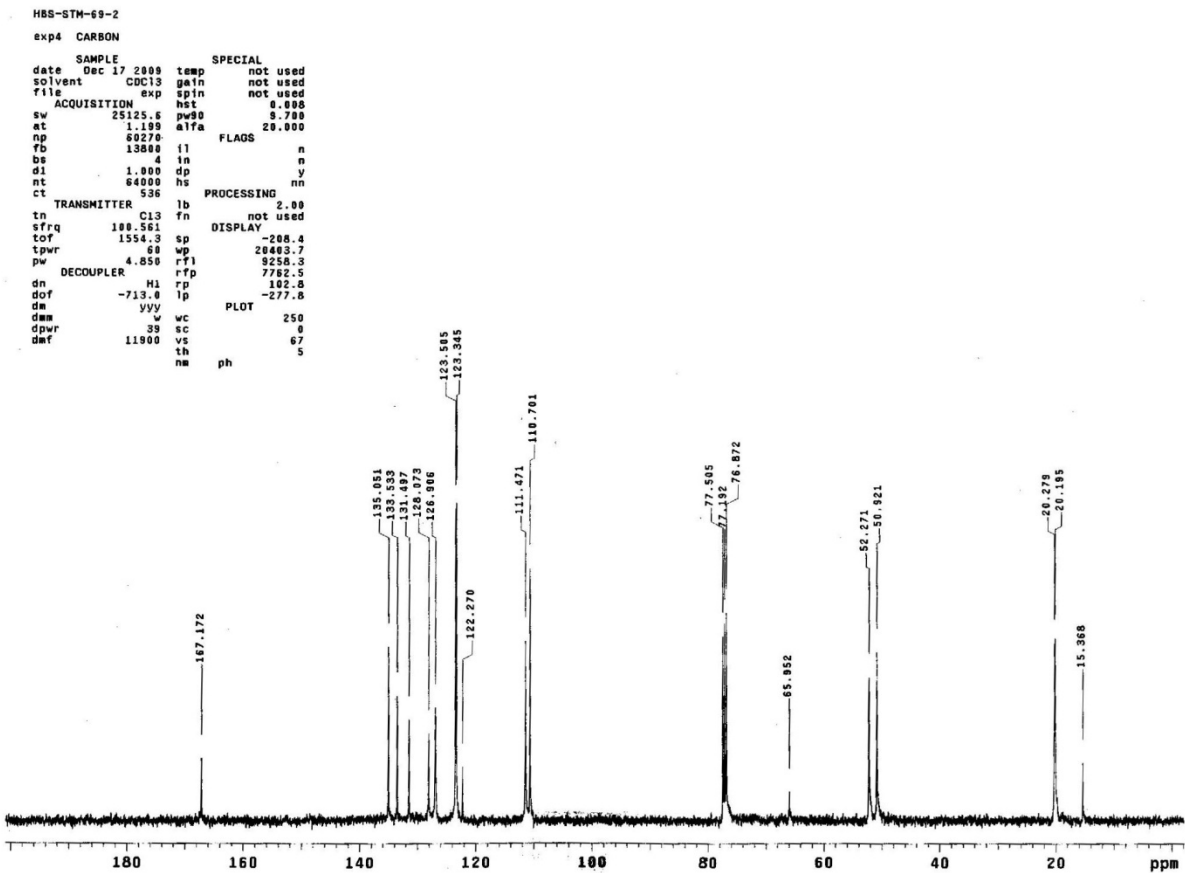

Figure 33.  $^{13}\text{C}$  NMR spectrum of 10.

```

HBS-STN-69-2
exp9 s2pu1
SAMPLE DEC. & VT
date Jan 25 2010 dn H1
solvent CDCl3 dof 0
file exp dm nnn
ACQUISITION dnm C
sfrq 57.220 dmf 200
tn 5677
PROCESSING
at 0.640 lb 20.00
np 128000 fn not used
pw 100000.0
fb 55000 werr
bs 8 wexp
pw 3.0 wbs
pw 3.0 wnt
tpwr 58
DISPLAY
d1 0 sp -34553.1
tof 0.0 wp 99998.5
nt 32000 vs 20
ct 2168 sc 0
atock n wc 250
gain 6 hzmm 48.91
FLAGS is 6828.51
i1 n rfl 34554.5
ln n rfp 0
dp y th 11
ins 65.734
nm ph

```

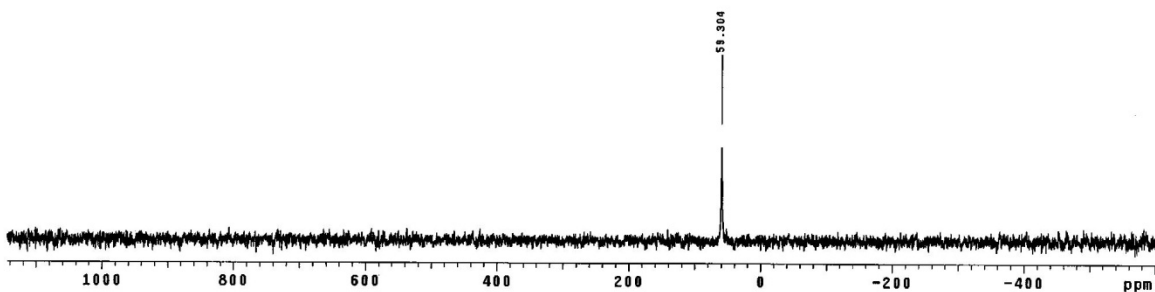

Figure 34.  $^{77}\text{Se}$  NMR spectrum of **10**.

## Eager 300 Report

Page: 1 Sample: STM69-2 (STM69-2)

Method Name : SP200110  
Method File : D:\CHNS2008\SP200110.mth  
Chromatogram : STM69-2  
Operator ID : SP  
Analysed : 01/20/2010 15:01  
Sample ID : STM69-2 (# 31)  
Analysis Type : UnkNown (Area)

Company Name : C.E. Instruments  
Printed : 1/29/2010 16:41  
Instrument N. : Instrument #1  
Sample weight : .844

Calib. method : using 'K Factors'

!!! Warning missing one or more peaks.

| Element Name | %       | Ret.Time | Area    | BC | Area ratio | K factor    |
|--------------|---------|----------|---------|----|------------|-------------|
| Nitrogen     | 8.0573  | 43       | 82701   | RS | 13.745680  | .121612E+07 |
| Carbon       | 50.6726 | 67       | 1136782 | RS | 1.000000   | .265804E+07 |
| Hydrogen     | 4.5040  | 172      | 248762  | RS | 4.569756   | .612939E+07 |
| Totals       | 63.2339 |          | 1468245 |    |            |             |

Figure 35. Elemental analysis of 10.

Elemental Composition Report

Single Mass Analysis (displaying only valid results)

Tolerance = 10.0 PPM / DBE: min = -1.5, max = 50.0

Isotope cluster parameters: Separation = 1.0 Abundance = 1.0%

Monoisotopic Mass, Odd and Even Electron Ions

65 formula(e) evaluated with 1 results within limits (up to 50 closest results for each mass)

Micromass : Q-ToF micro (YA-105)

Dept. Of Chemistry I.I.T.(B)

21-Apr-201111:02:48

C<sub>28</sub>H<sub>29</sub>N<sub>4</sub>Se<sub>2</sub>Br

HBS-STM-2-69 3 (0.030) AM (Cen,5, 80.00, Ht,5000.0,556.28,1.00); Sm (Mn, 2x4.00); Sb (5,40.00); Cm (3:50)

TOF MS ES+  
5.53e3

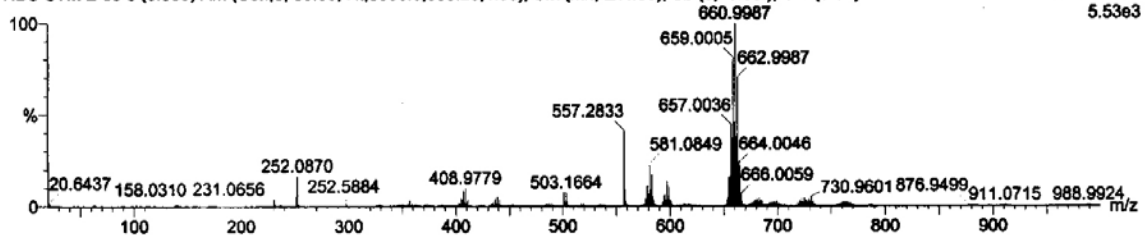

Minimum: -1.5  
Maximum: 200.0 10.0 50.0

| Mass     | Calc. Mass | mDa | PPM | DBE  | Score | Formula                                                           |
|----------|------------|-----|-----|------|-------|-------------------------------------------------------------------|
| 660.9987 | 660.9984   | 0.2 | 0.4 | 17.5 | 1     | C <sub>28</sub> H <sub>30</sub> N <sub>4</sub> Se <sub>2</sub> Br |

Figure 36. Mass spectrum of 10.

NAME HBS-STM-3-82-3-1H  
 EXPNO 9  
 PROCNO 1  
 Date 20110622  
 Time 11.09  
 INSTRUM spect  
 FREQHD 5 mm PABBO BB-  
 PULPROG zg30  
 TD 65536  
 SOLVENT CDCl3  
 NS 24  
 DS 0  
 SWH 8223.685 Hz  
 FIDRES 0.125483 Hz  
 AQ 3.9846387 sec  
 RG 228  
 DW 60.800 usec  
 DE 6.50 usec  
 TE 295.6 K  
 D1 1.0000000 sec  
 TDO 1

HBS-STM-3-82-3-1H

----- CHANNEL f1 -----  
 NUC1 1H  
 P1 13.50 usec  
 PL1 -1.00 dB  
 PL1W 10.56200695 W  
 SFO1 400.1324710 MHz  
 SI 32768  
 SF 400.1300079 MHz  
 WDW EM  
 SSB 0  
 LB 0.00 Hz  
 GB 0  
 PC 1.00

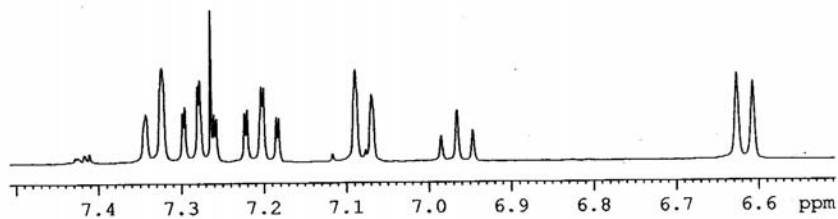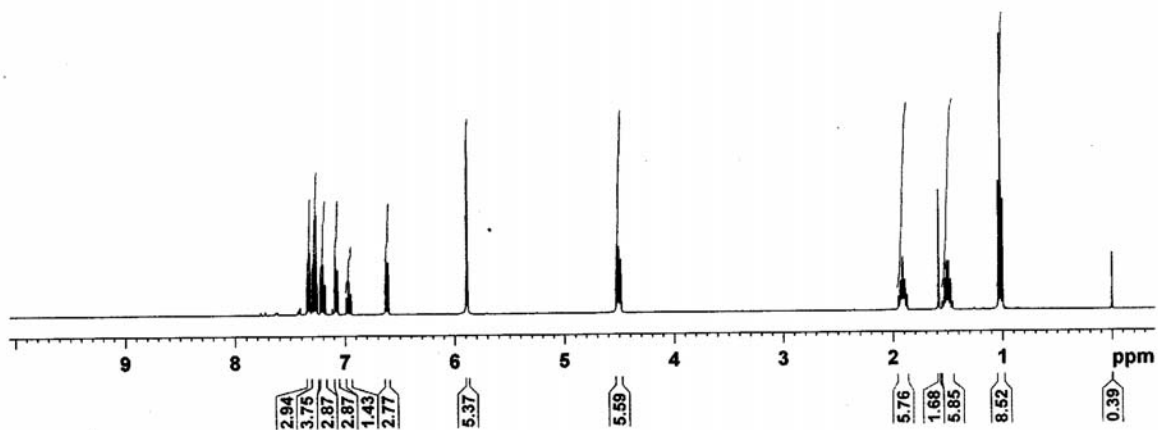

Figure 37.  $^1\text{H}$  spectrum of **11**.

HBS-STM-3-82-3a-13C

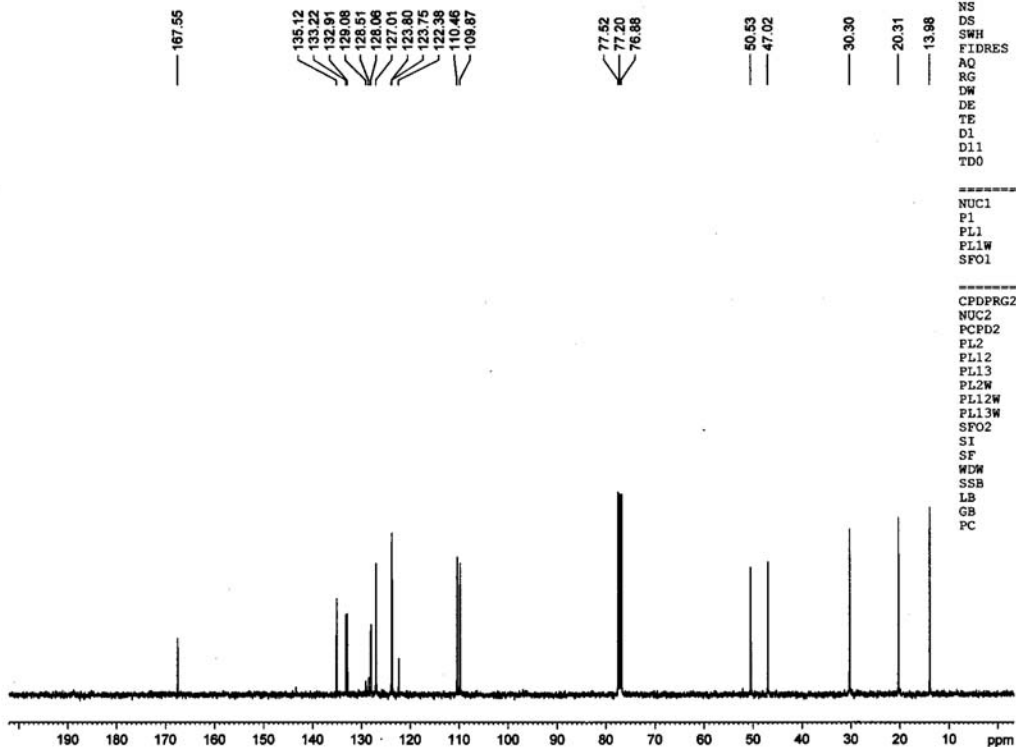

```
NAME      HBS-STM-3-82-3a-13C
EXPNO     8
PROCNO    1
Date_     20110623
Time      9.22
INSTRUM   spect
PROBHD    5 mm PABBO BB-
PULPROG   zgpg30
TD        65536
SOLVENT   CDCl3
NS        148
DS        2
SWH       27173.912 Hz
FIDRES    0.414641 Hz
AQ        1.2059124 sec
RG        2050
DW        18.400 usec
DE        6.50 usec
TE        296.4 K
D1        1.00000000 sec
D11       0.03000000 sec
TD0       1
```

```
===== CHANNEL f1 =====
NUC1      13C
P1        8.75 usec
PL1       -2.00 dB
PL1W     56.53121948 W
SF01     100.6238364 MHz
```

```
===== CHANNEL f2 =====
CPDPRG2   waltz16
NUC2      1H
PCPD2     80.00 usec
PL2       -1.00 dB
PL12     14.50 dB
PL13     14.50 dB
PL2W     10.56200695 W
PL12W    0.29767781 W
PL13W    0.29767781 W
SFO2     400.1316005 MHz
SI        32768
SF        100.6127595 MHz
WDW       EM
SSB       0
LB        2.00 Hz
GB        0
PC        1.40
```

Figure 38.  $^{13}\text{C}$  spectrum of **11**.

HBS-STM-3-82-3-77Se

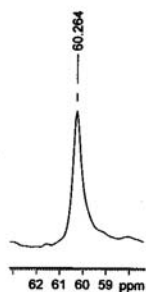

```
NAME      HBS-STM-3-82-3-77Se
EXPNO     7
PROCNO    1
Date_     20110623
Time      8.49
INSTRUM   spect
PROBHD    5 mm PABBO BB-
PULPROG   zg
TD         428544
SOLVENT   CDC13
NS         100
DS         4
SWH       300000.000 Hz
FIDRES    0.700045 Hz
AQ        0.7142900 sec
RG         228
DW         1.667 usec
DE         6.50 usec
TE         300.0 K
D1         1.00000000 sec
TDO        1
```

```
----- CHANNEL f1 -----
NUC1      77Se
P1        10.00 usec
PL1       0.00 dB
SF01     76.3642626 MHz
SI        65536
SF        76.3110246 MHz
WDW       EM
SSB       0
LB        30.00 Hz
GB        0
PC        0.10
```

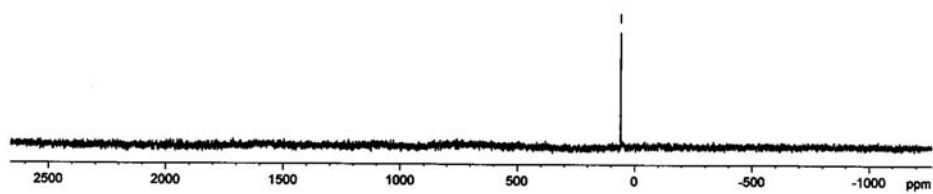

Figure 39.  $^{77}\text{Se}$  spectrum of **11**.



# Eager 300 Report

Page: 1 Sample: STM356-1 (STM356-1)

Method Name : sp270109  
Method File : D:\CHNS2008\sp270109.mth  
Chromatogram : STM356-1  
Operator ID : AGK  
Analysed : 01/27/2009 12:28  
Sample ID : STM356-1 (# 13)  
Analysis Type : UnkNown (Area)  
Company Name : C.E. Instruments  
Printed : 1/27/2009 15:16  
Instrument N. : Instrument #1  
Sample weight : 1.188

Calib. method : using 'K Factors'

!!! Warning missing one or more peaks.

| Element Name | %       | Ret. Time | Area    | BC | Area ratio | K factor    |
|--------------|---------|-----------|---------|----|------------|-------------|
| Nitrogen     | 8.9443  | 43        | 114340  | RS | 14.511700  | .107605E+07 |
| Carbon       | 52.5677 | 66        | 1659268 | RS | 1.000000   | .265265E+07 |
| Hydrogen     | 4.5887  | 169       | 472792  | RS | 3.509508   | .703485E+07 |
| Totals       | 66.1007 |           | 2246400 |    |            |             |

Figure 40. Elemental analysis of 11.

**Single Mass Analysis (displaying only valid results)**

Tolerance = 5.0 PPM / DBE: min = -1.5, max = 50.0

Isotope cluster parameters: Separation = 1.0 Abundance = 1.0%

Monoisotopic Mass, Odd and Even Electron Ions

54 formula(e) evaluated with 1 results within limits (up to 50 closest results for each mass)

Micromass : Q-ToF micro (YA-105)

Dept. Of Chemistry I.I.T.(B)

12-May-2011 11:12:15

C30H33N4Se2Br

HBS-STM-2-356 18 (0.177) AM (Cen,5, 80.00, Ar,5000.0,556.28,1.00); Sm (Mn, 2x6.00); Sb (5,40.00 ); Cm (1:33)

TOF MS ES+  
4.24e4

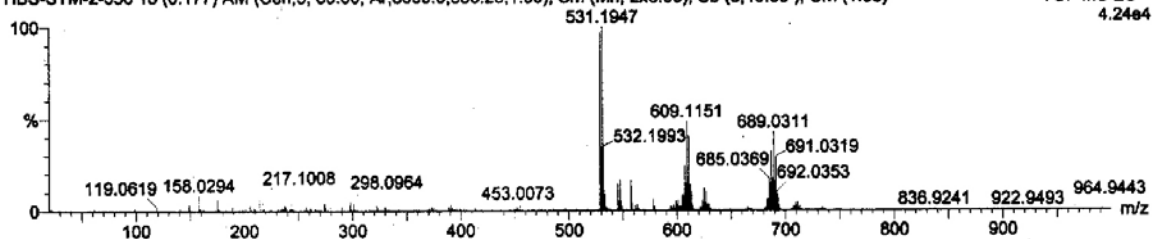

Minimum: -1.5  
Maximum: 50.0

| Mass     | Calc. Mass | mDa | PPM | DBE  | Score | Formula           |
|----------|------------|-----|-----|------|-------|-------------------|
| 689.0311 | 689.0297   | 1.3 | 1.9 | 17.5 | 1     | C30 H34 N4 Br Se2 |

Figure 41. Mass spectrum of 11.

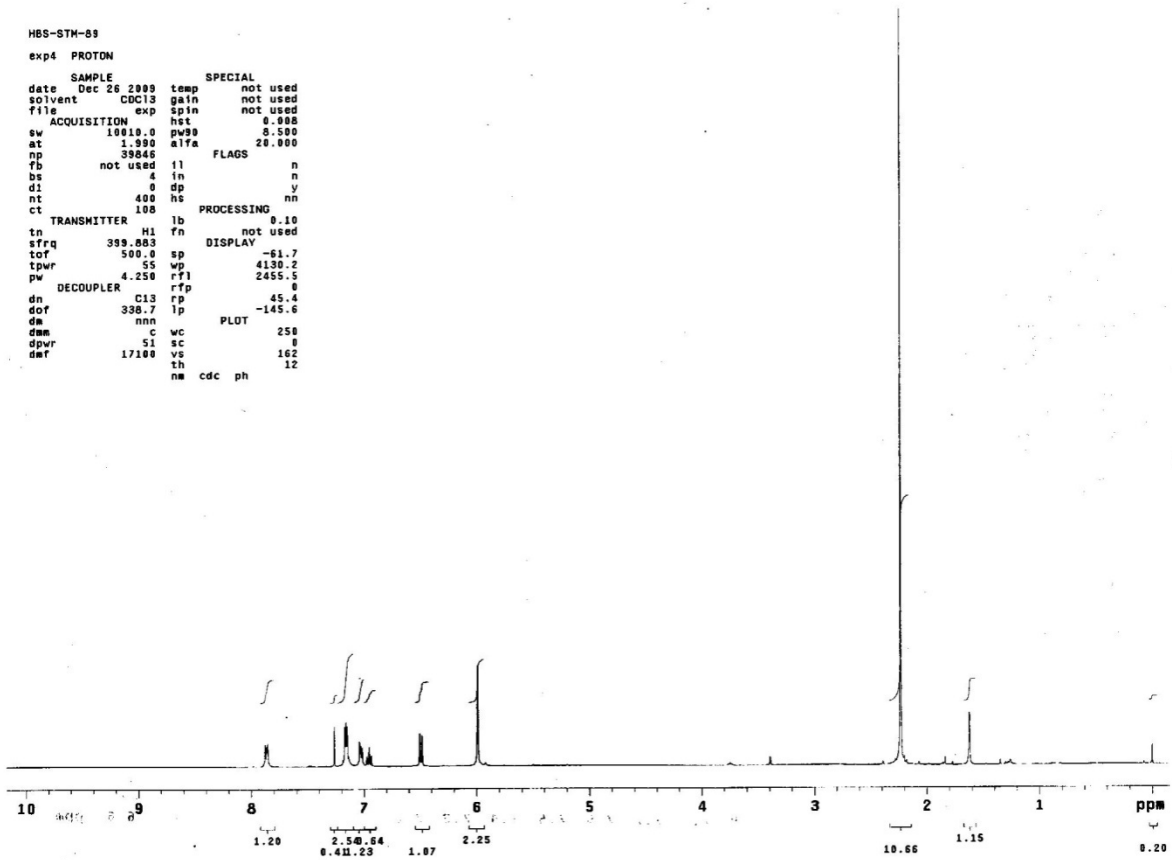

Figure 42. <sup>1</sup>H NMR spectrum of **12**.

```

HBS-STK-89
exp4 CARBON
SAMPLE
date Dec 26 2009 temp not used
solvent CDCl3 gain not used
file exp spin not used
ACQUISITION hst 0.000
sw 25125.6 pw90 14.000
at 1.199 alfa 20.000
np 80270
fd 13800 i1 n
bs 4 in n
dl 1.000 dp y
nt 40000 bs no
ct
TRANSMITTER jb PROCESSING 1.00
tn C13 Tn not used
sfrq 100.561 DISPLAY
tof 1354.3 sp -176.2
tpwr 56 wp 28337.7
pw 7.000 rfp 9259.1
DECOUPLER H1 rp 7762.5
dn -713.0 lp 127.1
dm yyy PLOT 250
dwm w wc 0
dpr 41 sc 0
dof 11900 vs 61
nm ph 4

```

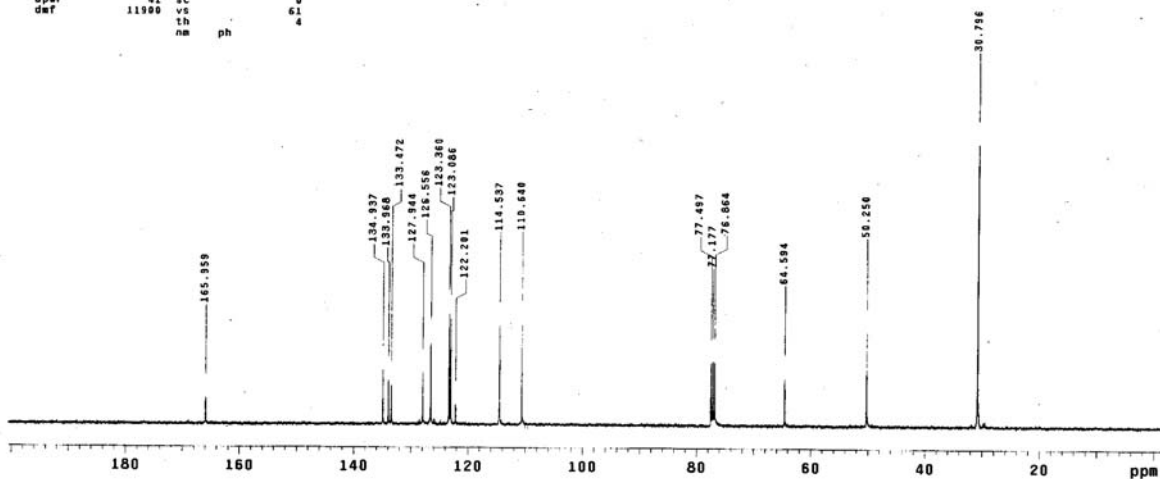

Figure 43. <sup>13</sup>C NMR spectrum of **12**.

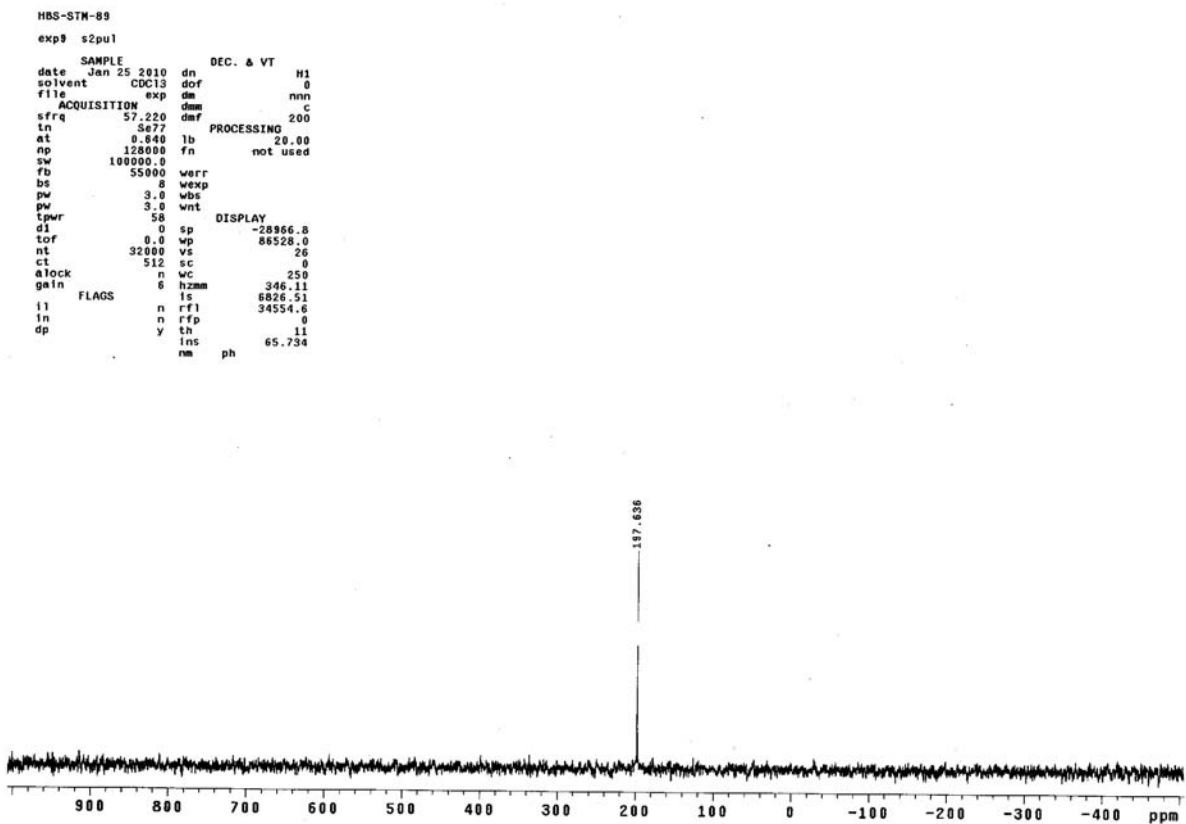

Figure 44.  $^{77}\text{Se}$  NMR spectrum of **12**.

# Eager 300 Report

Page: 1 Sample: STM89 (STM89)

Method Name : SP200110  
Method File : D:\CHNS2008\SP200110.mth  
Chromatogram : STM89  
Operator ID : SP Company Name : C.E. Instruments  
Analysed : 01/20/2010 11:54 Printed : 1/29/2010 16:41  
Sample ID : STM89 (# 10) Instrument N. : Instrument #1  
Analysis Type : UnkNown (Area) Sample weight : .8

Calib. method : using 'K Factors'

!!! Warning missing one or more peaks.

| Element Name | %       | Ret.Time | Area    | BC | Area ratio | K factor    |
|--------------|---------|----------|---------|----|------------|-------------|
| Nitrogen     | 6.7360  | 43       | 65534   | RS | 16.943880  | .121612E+0' |
| Carbon       | 52.2190 | 67       | 1110400 | RS | 1.000000   | .265804E+0' |
| Hydrogen     | 4.7659  | 172      | 249458  | RS | 4.451250   | .612939E+0' |
| Totals       | 63.7208 |          | 1425392 |    |            |             |

Figure 45. Elemental analysis of 12.

Single Mass Analysis (displaying only valid results)

Tolerance = 5.0 PPM / DBE: min = -1.5, max = 50.0

Isotope cluster parameters: Separation = 1.0 Abundance = 1.0%

Monoisotopic Mass, Odd and Even Electron Ions

27 formula(e) evaluated with 1 results within limits (up to 50 closest results for each mass)

Micromass : Q-Tof micro (YA-105)

Dept. Of Chemistry I.I.T.(B)

12-May-2011 11:12:15

C<sub>30</sub>H<sub>33</sub>N<sub>4</sub>Se<sub>2</sub>Br

HBS-STM-2-89 18 (0.177) AM (Cen,5, 80.00, Ht,5000.0,556.28,1.00); Sm (SG, 3x6.00); Sb (5,40.00 ); Cm (1:34)

TOF MS ES+  
3.31e3

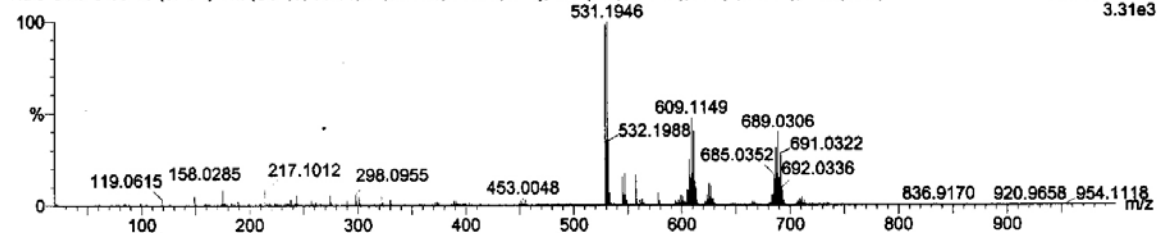

Minimum: -1.5  
Maximum: 200.0 5.0 50.0

| Mass     | Calc. Mass | mDa | PPM | DBE  | Score | Formula                                                           |
|----------|------------|-----|-----|------|-------|-------------------------------------------------------------------|
| 689.0306 | 689.0297   | 0.9 | 1.3 | 17.5 | 1     | C <sub>30</sub> H <sub>34</sub> N <sub>4</sub> Se <sub>2</sub> Br |

Figure 46. Mass spectrum of 12.

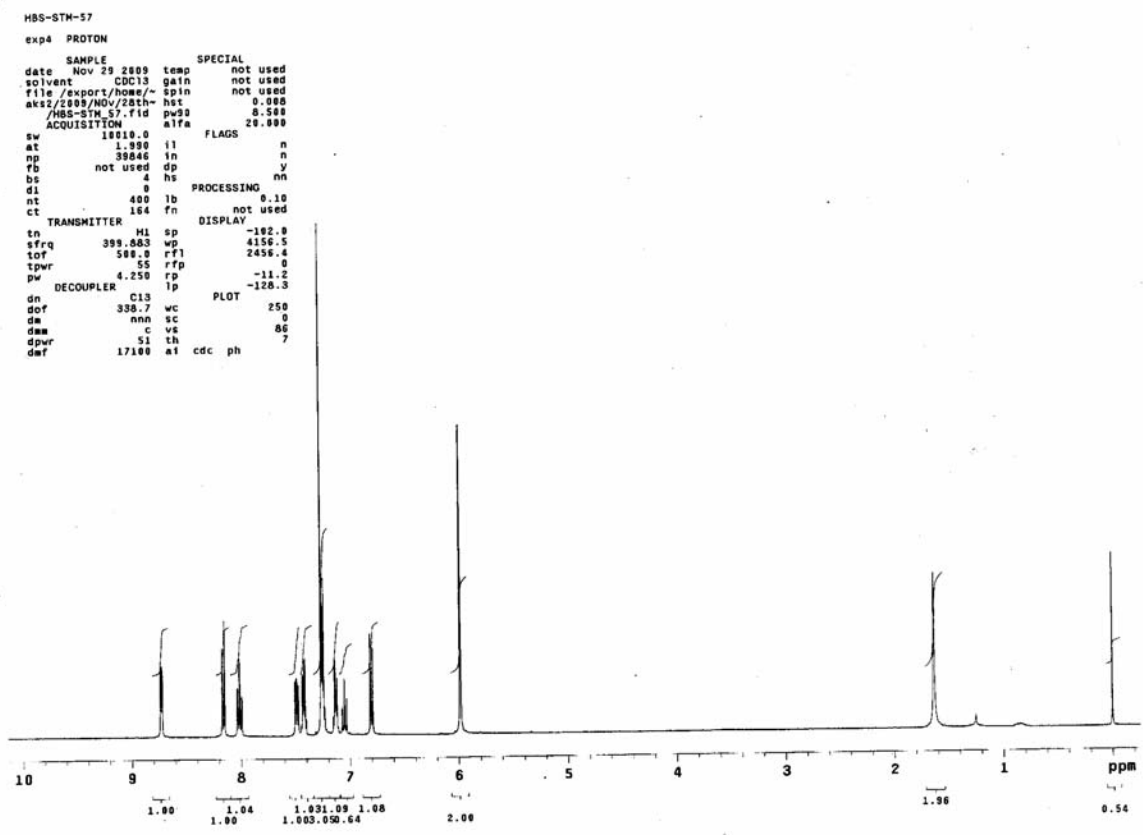

Figure 47. <sup>1</sup>H NMR spectrum of **13**.



```

HBS-STW-53
exp4 CARBON
SAMPLE SPECIAL
date Dec 6 2009 temp not used
solvent CDCl3 gain not used
file /export/home/~ sp1n not used
hbs1/2009/DEC/HBS-- hst 0.000
STM-53-13C.fid pws0 14.000
ACQUISITION a1fa 20.000
sw 25125.6 FLAGS
at 1.199 11 n
np 80270 1n n
Yb 13600 dp y
bs 4 hs nn
d1 1.000 PROCESSING 1.00
nt 40000 lb not used
ct 8204 fn DISPLAY
TRANSMITTER C13 sp -204.6
sfrq 100.561 wp 20370.7
tot 1554.3 rfl 3254.5
tpwr 56 rfp 7782.5
pw 7.000 rp 44.2
DECOUPLER HI 1p -299.8
dn dof -713.0 wc 250
dm dww yyv sc 8
dww w vs 55
dpwr 41 th 7
dat 11900 nm ph 7

```

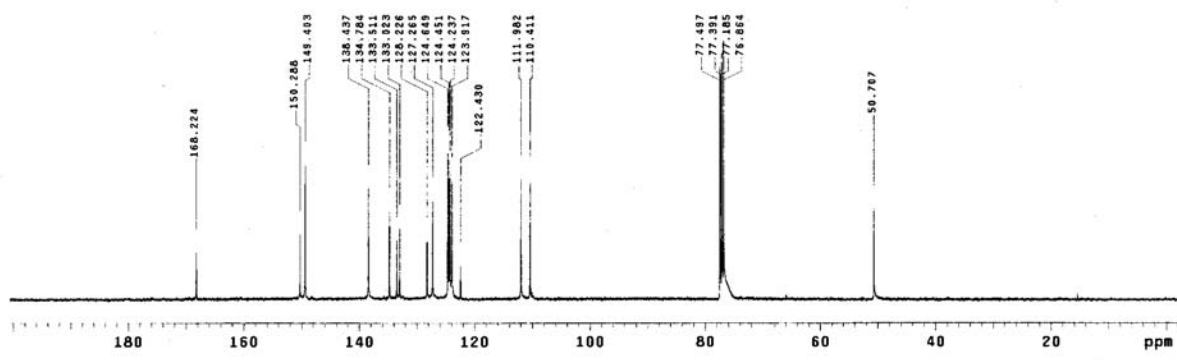

Figure 48. <sup>13</sup>C NMR spectrum of **13**.

```

HBS-STH-57
exp9 s2pu1
SAMPLE DEC. & VT H1
date Jan 25 2010 dn 0
solvent CDCl3 dof 0
file CDC13 ds nnn
ACQUISITION exp dnm c
sfrq 57.220 dmf 200
tn Sc77 PROCESSING
at 0.640 lb 20.00
np 128000 fn not used
sw 100000.0
rd 5500 werr
bs 8 wexp
pw 3.0 wbs
pv 3.0 wnt
tpwr 58 DISPLAY
d1 0 sp -28693.7
tof 0.0 vp 86494.4
nt 32000 vs 25
ct 592 sc 0
alock n wc 250
gain 6 hzwm 345.98
FLAGS ls 6826.51
il n rfl 34554.6
in n rfp 0
dp y th 11
ins 65.734
nm ph

```

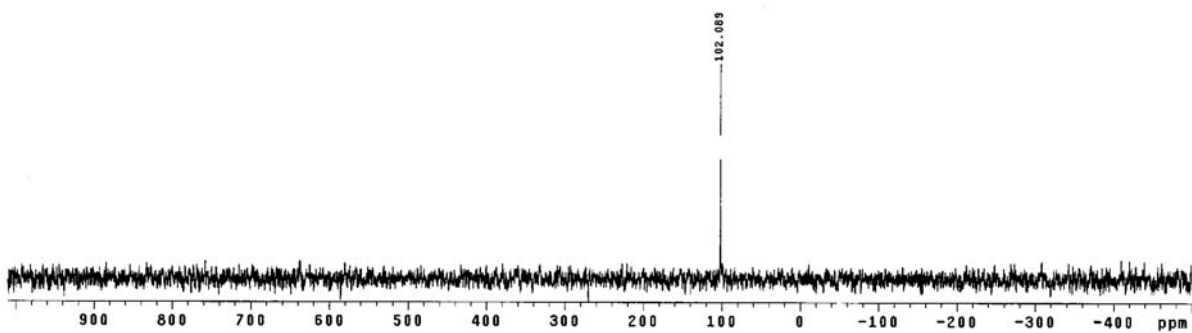

Figure 49.  $^{77}\text{Se}$  NMR spectrum of **13**.

# Eager 300 Report

Page: 1 Sample: STM89 (STM89)

Method Name : SP200110  
Method File : D:\CHNS2008\SP200110.mth  
Chromatogram : STM89  
Operator ID : SP Company Name : C.E. Instruments  
Analysed : 01/20/2010 11:54 Printed : 1/29/2010 16:41  
Sample ID : STM89 (# 10) Instrument N. : Instrument #1  
Analysis Type : UnkNown (Area) Sample weight : .8

Calib. method : using 'K Factors'

!!! Warning missing one or more peaks.

| Element Name | %       | Ret.Time | Area    | BC | Area ratio | K factor    |
|--------------|---------|----------|---------|----|------------|-------------|
| Nitrogen     | 6.7360  | 43       | 65534   | RS | 16.943880  | .121612E+0' |
| Carbon       | 52.2190 | 67       | 1110400 | RS | 1.000000   | .265804E+0' |
| Hydrogen     | 4.7659  | 172      | 249458  | RS | 4.451250   | .612939E+0' |
| Totals       | 63.7208 |          | 1425392 |    |            |             |

Figure 50. Elemental analysis of 13.

**Elemental Composition Report**

**Single Mass Analysis (displaying only valid results)**

Tolerance = 10.0 PPM / DBE: min = -1.5, max = 50.0

Isotope cluster parameters: Separation = 1.0 Abundance = 1.0%

Monoisotopic Mass, Odd and Even Electron Ions

82 formula(e) evaluated with 1 results within limits (up to 50 closest results for each mass)

Micromass : Q-ToF micro (YA-105)

Dept. Of Chemistry I.I.T.(B)

21-Apr-2011 10:42:09

C32H23N6Se2Br

HBS-STM-2-57 5 (0.051) AM (Cen,5, 80.00, Ht,5000.0,556.28,1.00); Cm (5:28)

TOF MS ES+  
723

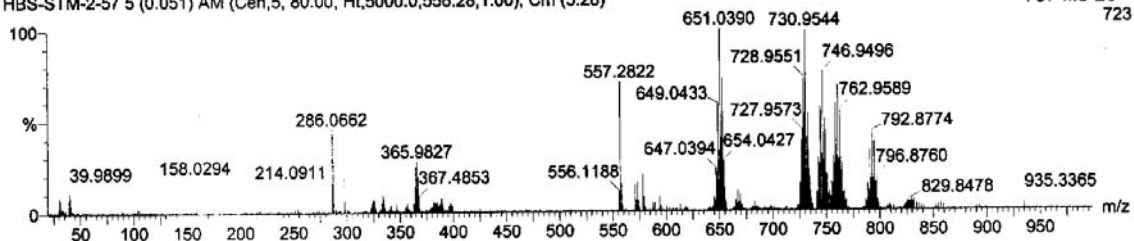

Minimum: -1.5  
Maximum: 50.0

| Mass     | Calc. Mass | mDa  | PPM  | DBE  | Score | Formula           |
|----------|------------|------|------|------|-------|-------------------|
| 730.9544 | 730.9576   | -3.2 | -4.4 | 25.5 | 1     | C32 H24 N6 Se2 Br |

Figure 51. Mass spectrum of 13.

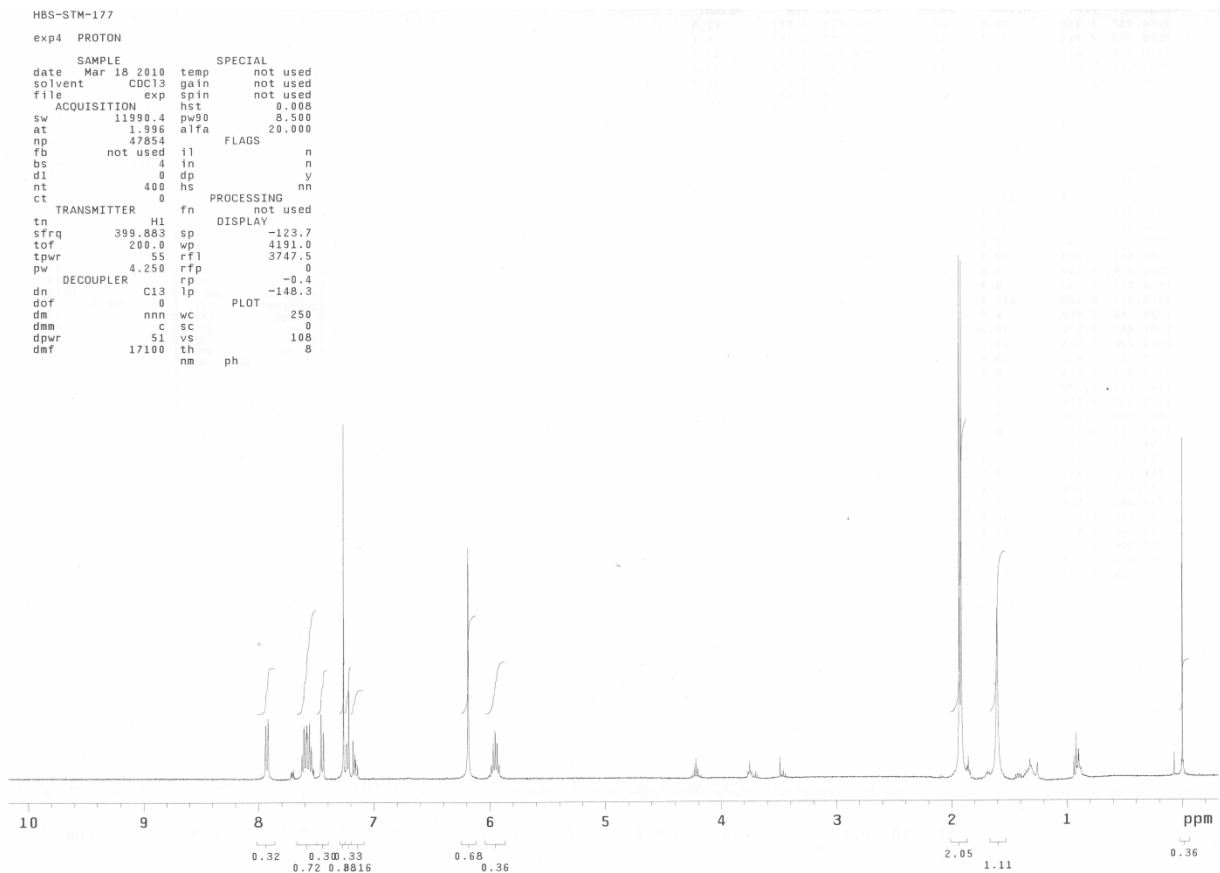

Figure 52.  $^1\text{H}$  NMR spectrum of complex **14**.

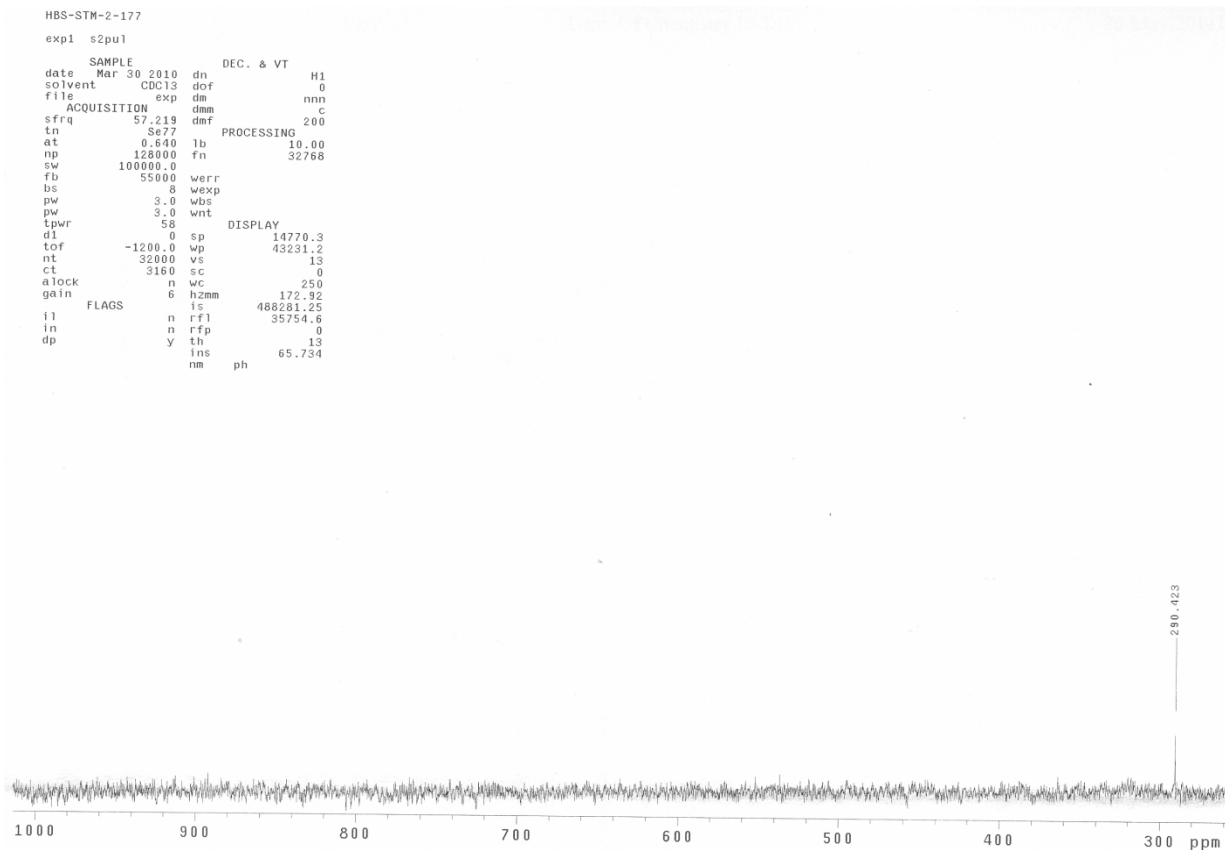

Figure 53.  $^{77}\text{Se}$  NMR spectrum of complex **14**.

# Eager 300 Report

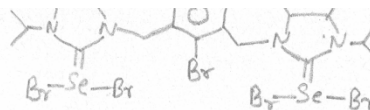

Page: 1 Sample: STM-2-177 (STM-2-177)

Method Name : SP160410  
 Method File : D:\CHNS2008\SP160410.mth  
 Chromatogram : STM-2-177  
 Operator ID : SP  
 Analysed : 04/16/2010 11:40  
 Sample ID : STM-2-177 (# 7)  
 Analysis Type : UnkNown (Area)

Company Name : C.E. Instruments  
 Printed : 4/16/2010 14:54  
 Instrument N. : Instrument #1  
 Sample weight : .678

Calib. method : using 'K Factors'

!!! Warning missing one or more peaks.

| Element Name | %       | Ret. Time | Area     | BC     | Area ratio | K factor              |
|--------------|---------|-----------|----------|--------|------------|-----------------------|
| Nitrogen     | 5.72    | 6.0057    | 0.28 43  | 53640  | RS         | 11.692450 .131732E+07 |
| Carbon       | 34.35   | 34.1689   | 0.19 68  | 627183 | RS         | 1.000000 .269542E+07  |
| Hydrogen     | 2.99    | 2.8436    | 0.15 169 | 201035 | RS         | 3.119770 .710139E+07  |
| Totals       | 43.0182 |           |          | 881858 |            |                       |

Figure 54. Elemental analysis of 14.

C<sub>28</sub>H<sub>29</sub>Br<sub>5</sub>N<sub>4</sub>Se<sub>2</sub>

HBS-STM-2-177 13 (0.130) AM (Cen,5, 80.00, Ht,5000.0,556.28,1.00); Sm (SG, 3x6.00); Sb (5,40.00 ); Cm (1:92)

TOF MS ES+  
1.26e4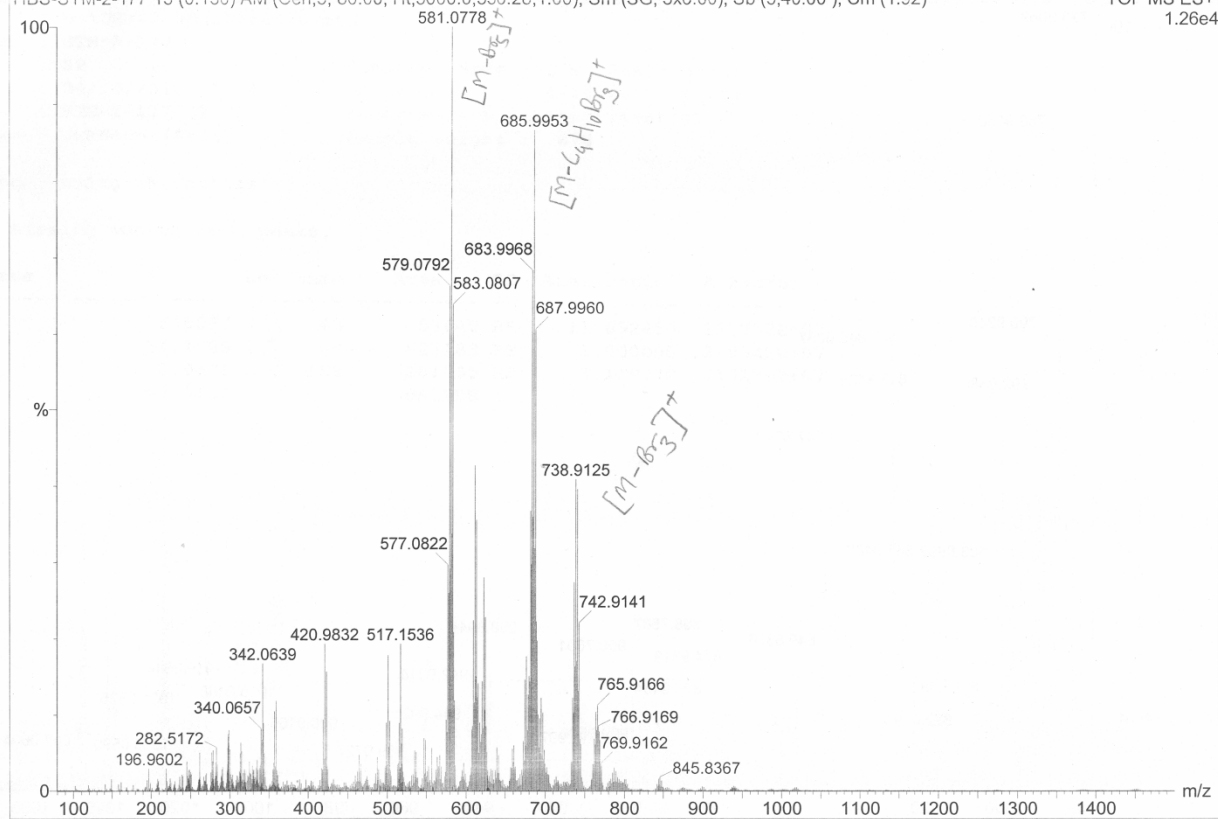

Figure 55. Mass spectrum of complex 14.



```

HBS-STM-103
exp4 PROTON
SAMPLE
date Jan 13 2010
solvent CDCL3
file exp
ACQUISITION
sw 12987.0
at 1.998
np 51898
fb not used
bs 4
d1 0
nt 400
ct 112
TRANSMITTER H1
tn 399.883
sfrq 200.0
tof 55
tpwr 4.250
pw DECOUPLER C13
dn 0
dof 0
dm nnn
dmm c
dpwr 51
dmf 17100
temp not used
gain not used
spn not used
nst 0.008
pw00 8.500
alfa 20.000
SPECIAL
flags n
in n
dp y
hs nn
PROCESSING
lb 0.00
fn not used
DISPLAY
sp -82.8
wp 4129.9
rfl 4246.8
rfp 0
rp 25.8
lp -182.0
PLOT
wc 250
sc 0
vs 128
th 6
nm ph

```

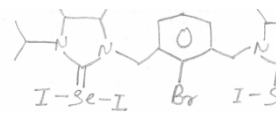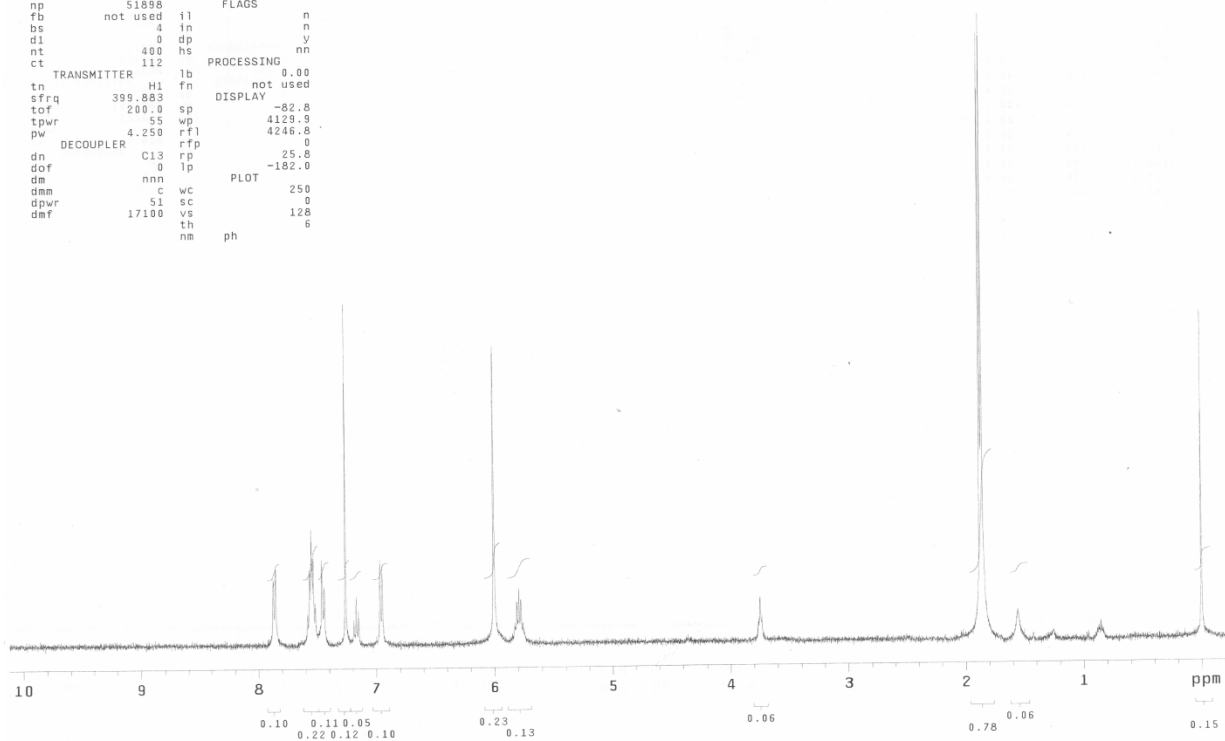

Figure 56. <sup>1</sup>H NMR spectrum of complex 15.

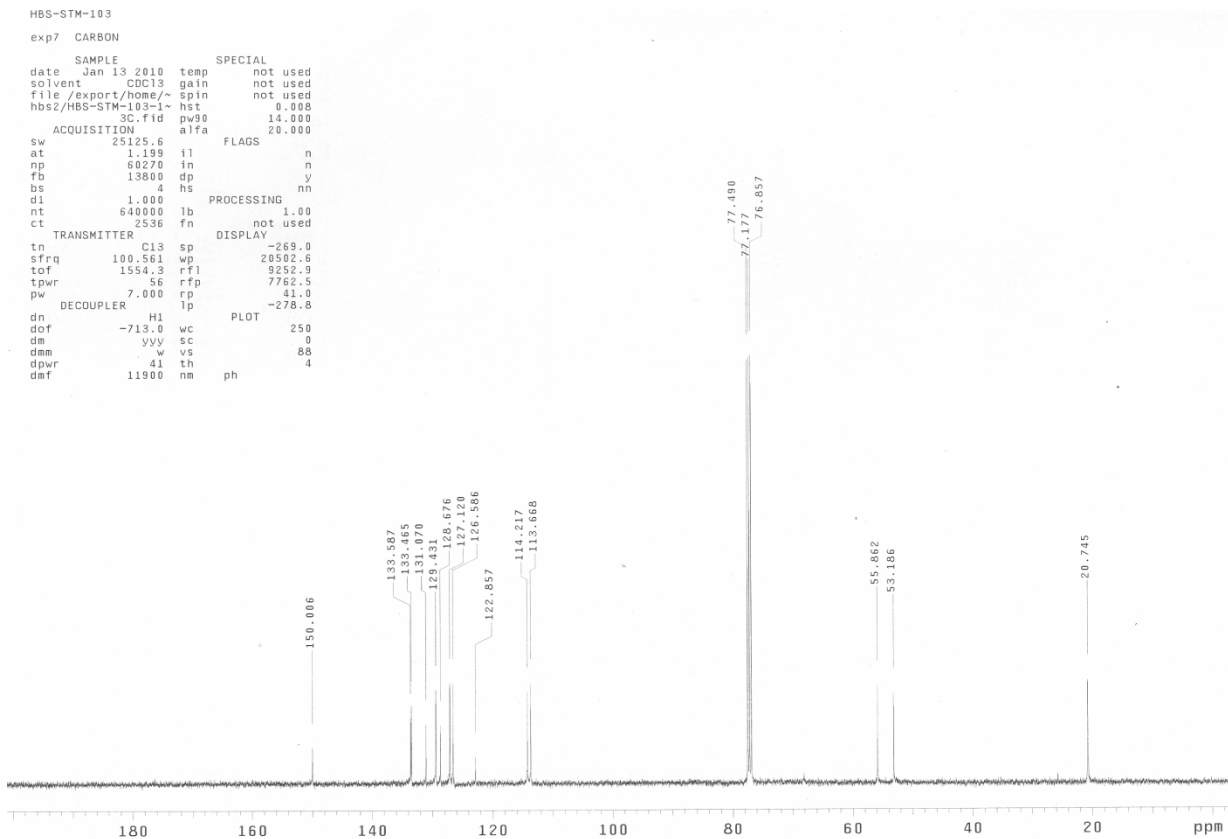

Figure 57.  $^{13}\text{C}$  NMR spectrum of complex **15**.

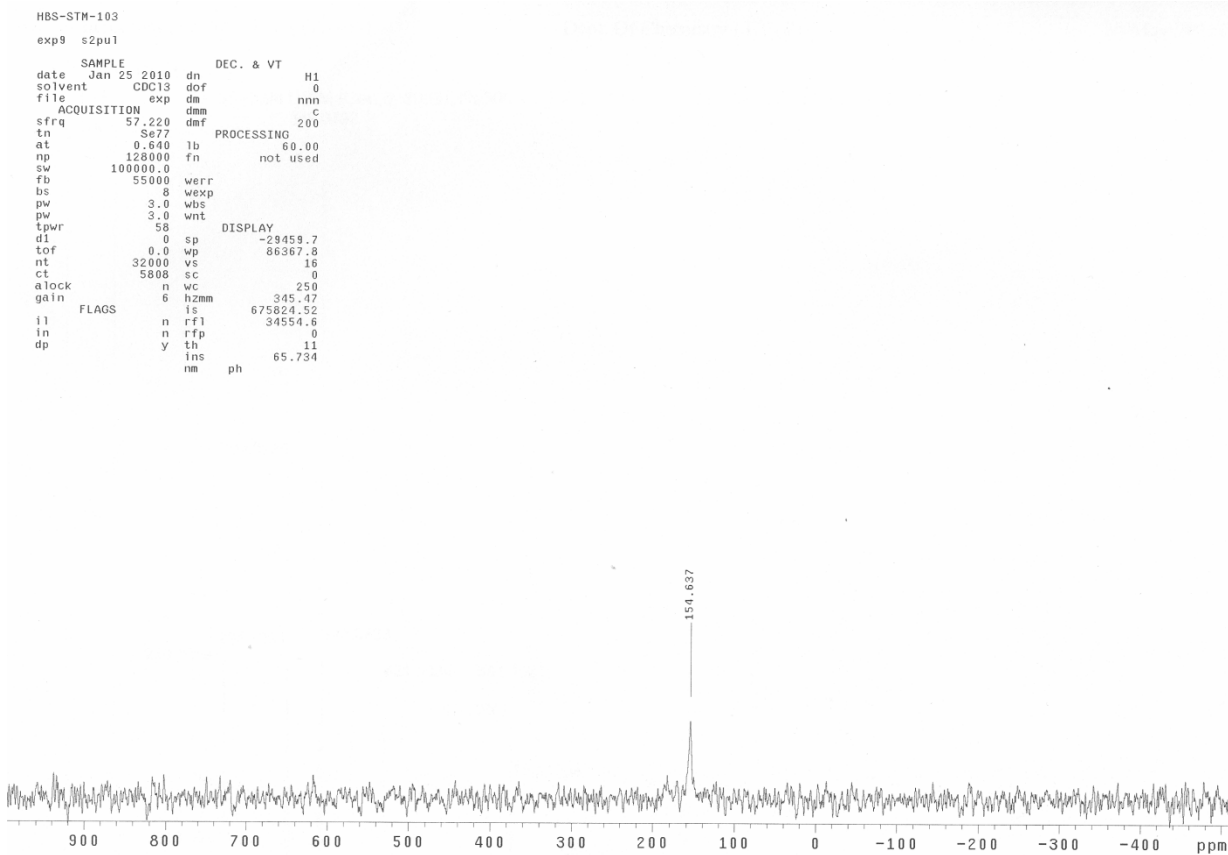

Figure 58.  $^{77}\text{Se}$  NMR spectrum of complex **15**.

C<sub>28</sub>H<sub>29</sub>BrI<sub>4</sub>N<sub>4</sub>Se<sub>2</sub>

HBS-STM-2-103 95 (0.941) AM (Cen,5, 80.00, Ht,5000.0,556.28,1.00); Sm (Mn, 3x6.00); Sb (5,40.00 ); Cm (42:99)

TOF MS ES+  
3.22e3

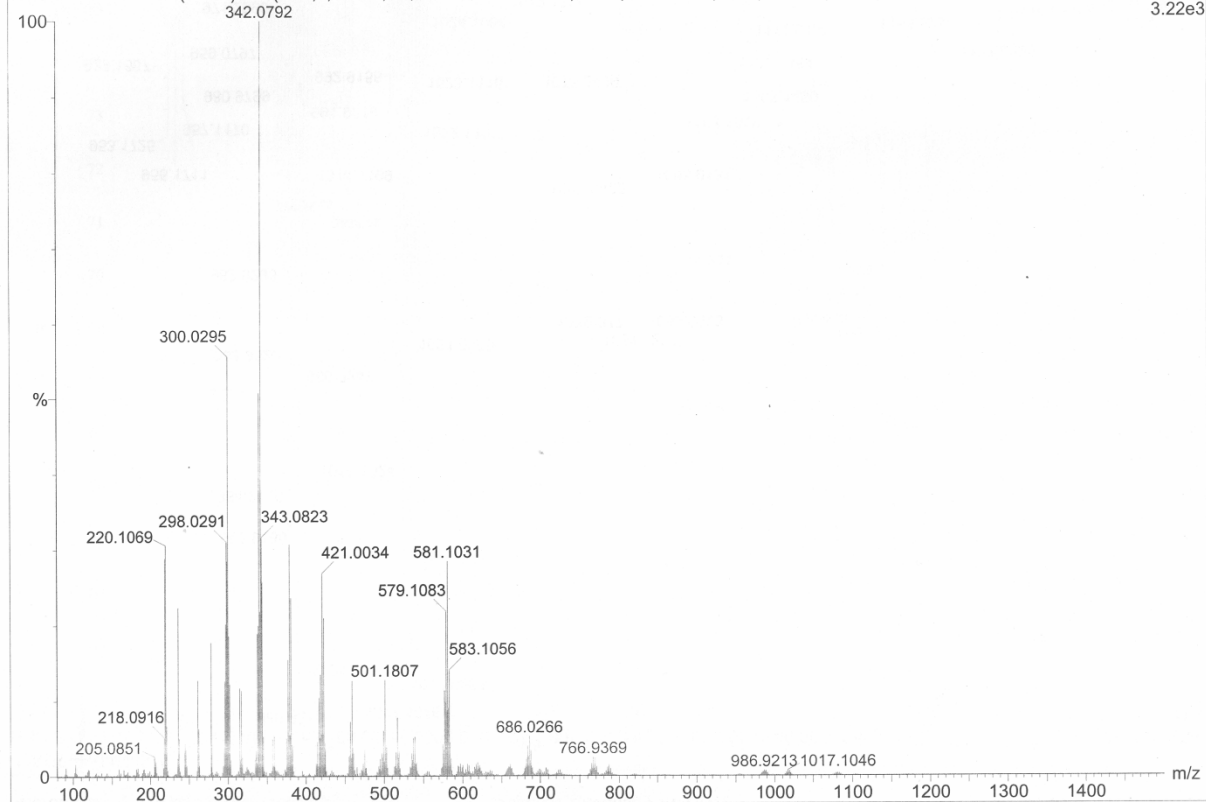

Figure 59. Mass spectrum of complex 15.

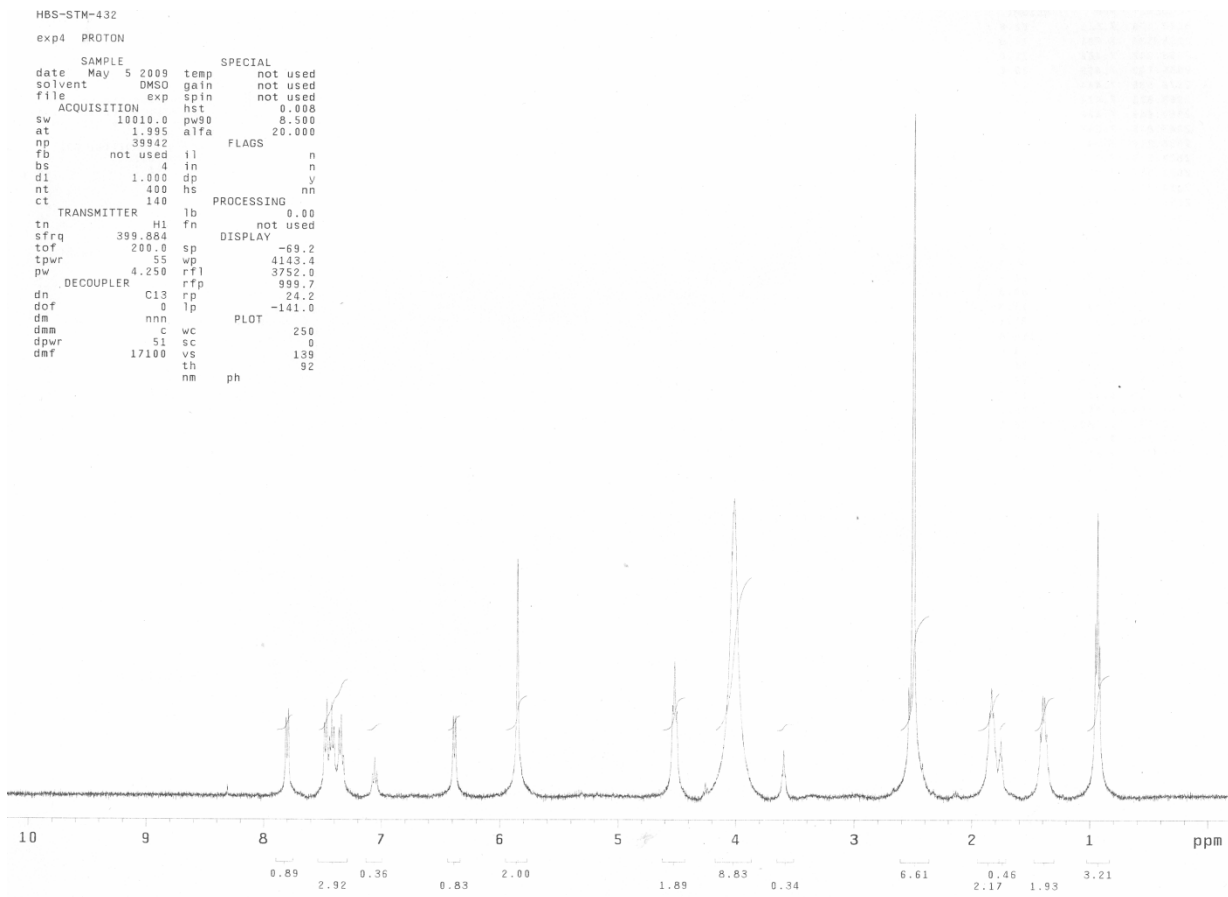

Figure 60.  $^1\text{H}$  NMR spectrum of complex **16**.

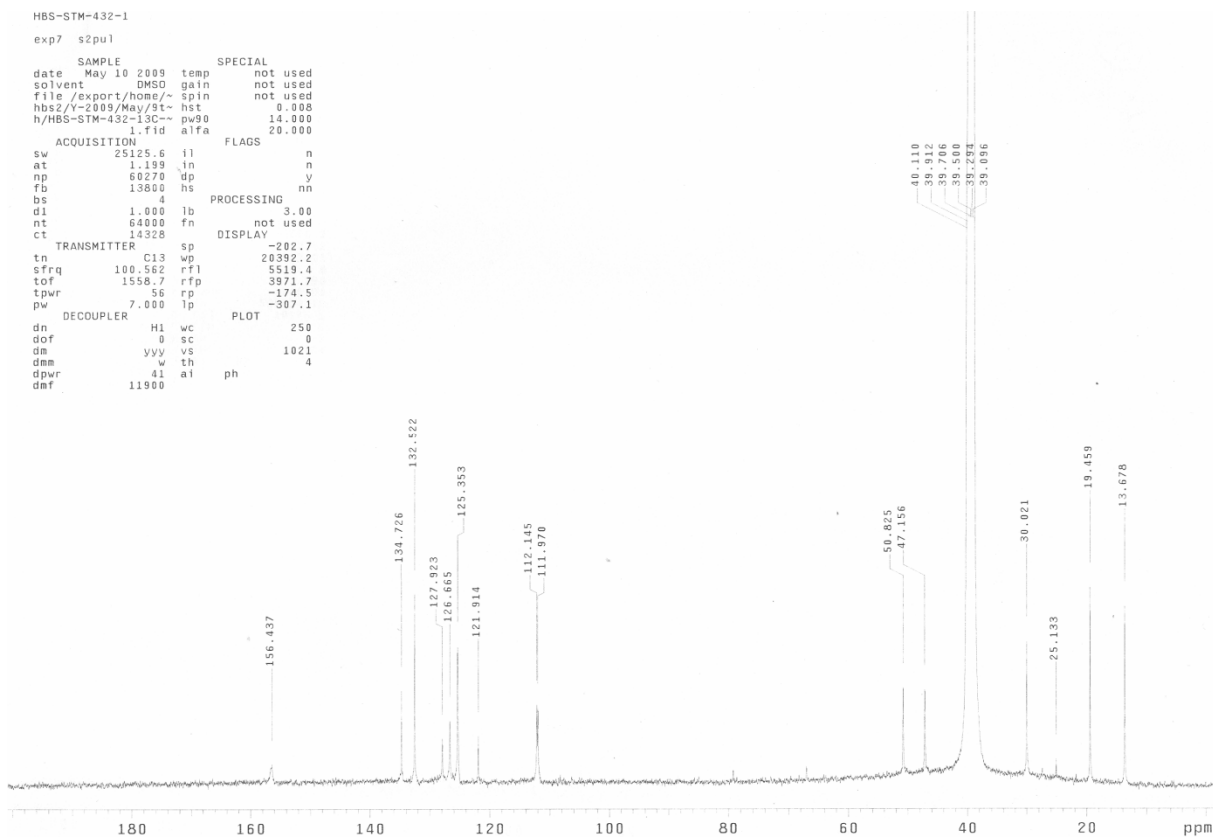

Figure 61.  $^{13}\text{C}$  NMR spectrum of complex 16.

```

HBS-STH-432
exp# s2pu1
SAMPLE
date May 12 2009 dn DEC. & VT H1
solvent DMSO dof 0
file exp dm nnn
ACQUISITION exp dm c
sfrq 57.235 dmm 200
tn Se77 dmf
at 0.640 lb 40.00
np 128000 fn not used
sw 100000.0
fb 55000 werr
bs 2 wexp
pw 3.0 wbs
pw 3.0 wnt
tpwr 58
d1 0 sp DISPLAY
d1 0 sp -2058.9
tof 15000.0 wp 61827.2
nt 120000 vs 227101
ct 92412 sc 0
elock n vc 250
gain 6 hzmm 246.51
FLAGS is 529754.13
il n rfl 19273.8
in n rfp 0
dp y th 7
ai ins 65.734
ph

```

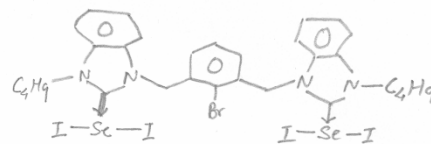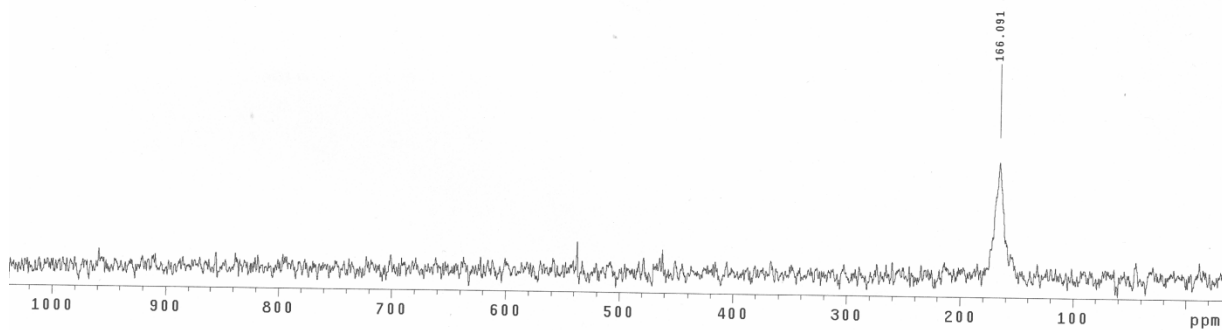

Figure 62. <sup>77</sup>Se NMR spectrum of complex 16.

# Eager 300 Report

Page: 1 Sample: STM432 (STM432)

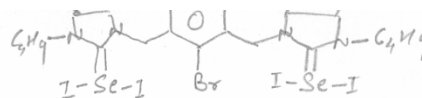

Method Name : SP060509  
 Method File : D:\CHNS2008\SP060509.mth  
 Chromatogram : STM432  
 Operator ID : SP  
 Analysed : 05/06/2009 14:45  
 Sample ID : STM432 (# 24)  
 Analysis Type : UnkNown (Area)  
 Company Name : C.E. Instruments  
 Printed : 5/6/2009 16:02  
 Instrument N. : Instrument #1  
 Sample weight : 1.5

Calib. method : using 'K Factors'

!!! Warning missing one or more peaks.

| Element Name | %       | Ret. Time | Area    | BC | Area ratio | K factor    |
|--------------|---------|-----------|---------|----|------------|-------------|
| Nitrogen     | 4.69    | 5.2153    | 100027  | FU | 12.102110  | .127862E+07 |
| 2            | 0.0000  | 0.52      | 119904  | FU |            | 0.0000      |
| Carbon       | 30.15   | 30.0746   | 1210533 | FU | 1.000000   | .267797E+07 |
| Hydrogen     | 2.78    | 2.4616    | 264102  | RS | 4.583580   | .674873E+07 |
| Totals       | 37.7515 |           | 1694565 |    |            |             |

Figure 63. Elemental analysis of 16.



HBS-NG-3-10-1h

NAME HBS-NG-3-10-1h  
EXPNO 15  
PROCNO 1  
Date\_ 20130305  
Time\_ 13.15  
INSTRUM spect  
PROBHD 5 mm PABBO BB-  
PULPROG zg30  
TD 52630  
SOLVENT DMSO  
NS 36  
DS 0  
SWH 8223.685 Hz  
FIDRES 0.156255 Hz  
AQ 3.1999540 sec  
RG 32  
DW 60.800 usec  
DE 6.50 usec  
TE 294.4 K  
D1 1.00000000 sec  
TD0 1

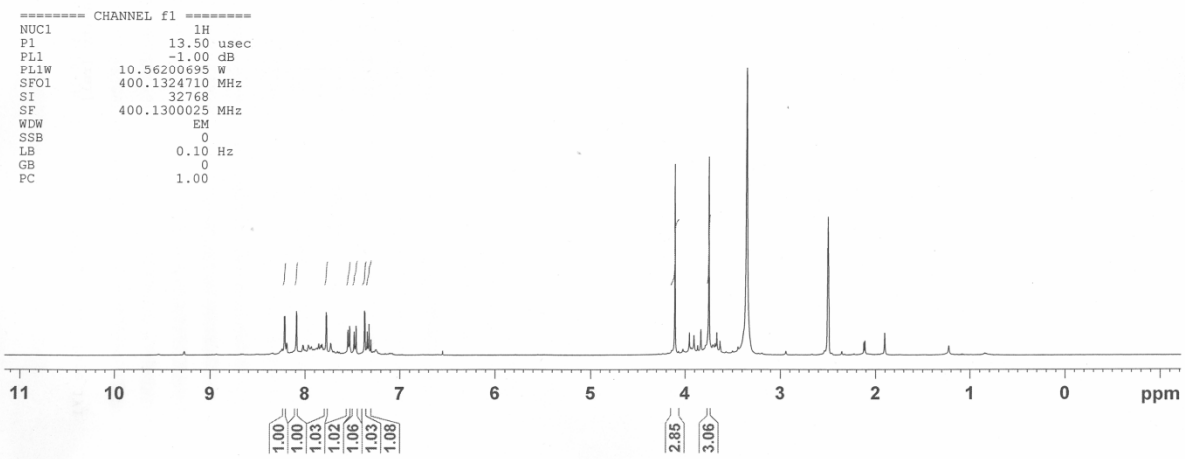

Figure 64:  $^1\text{H}$  NMR spectrum of **18**.

HBS-NG-03-10-13C

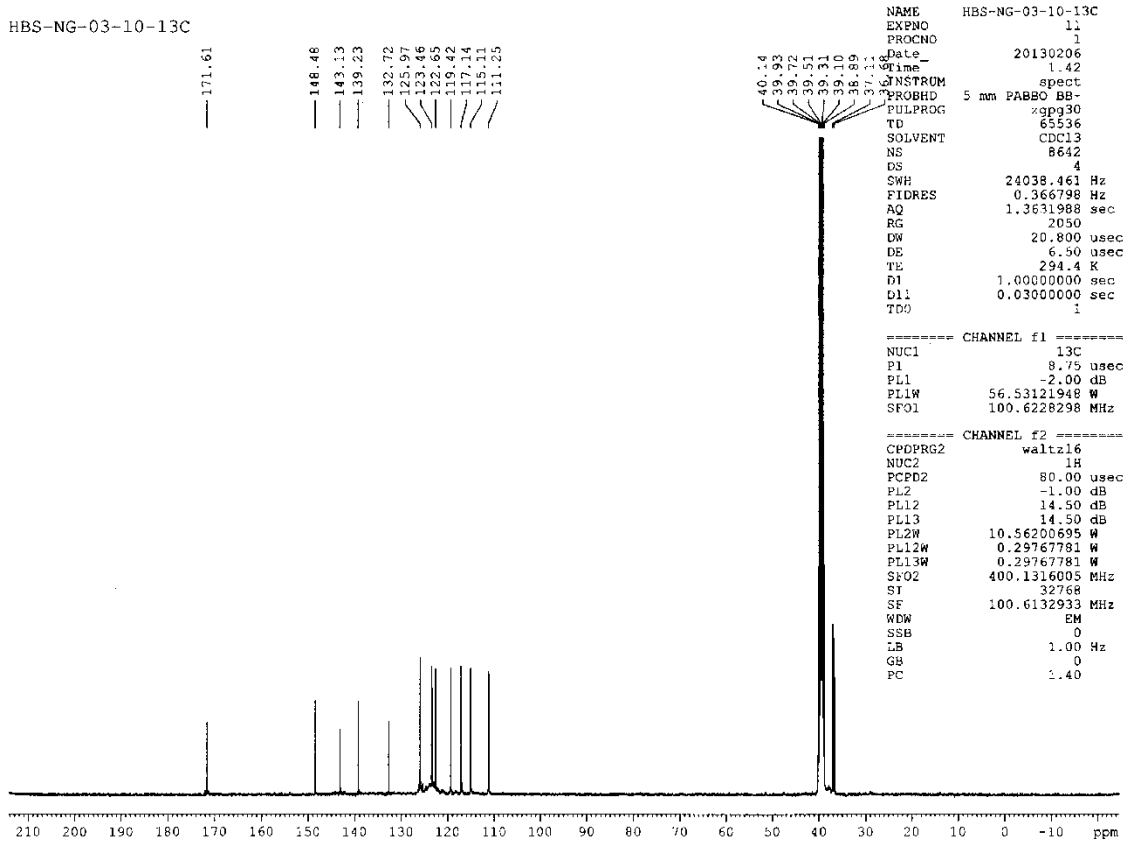

Figure 65:  $^{13}\text{C}$  NMR spectrum of **18**.

HBS-NG-3-10-77Se

NAME HBS-NG-3-10-77Se  
EXPNO 5  
PROCNO 1  
Date\_ 20130123  
Time 7.57  
INSTRUM spect  
PROBHD 5 mm PABBO BB-  
PULPROG zg  
TD 65536  
SOLVENT DMSO  
NS 147  
DS 4  
SWH 326086.969 Hz  
FIDRFS 4.975692 Hz  
AQ 0.1005385 sec  
RG 256  
DW 1.533 usec  
DE 6.50 usec  
TE 292.4 K  
D1 1.00000000 sec  
TD0 1

===== CHANNEL f1 =====  
NUC1 77Se  
P1 10.00 usec  
PL1 0.00 dB  
SFO1 76.3490004 MHz  
SI 65536  
SF 76.3110246 MHz  
WFW 0  
SSB 0  
LB 30.00 Hz  
GB 0  
PC 0.00

----- 97.858

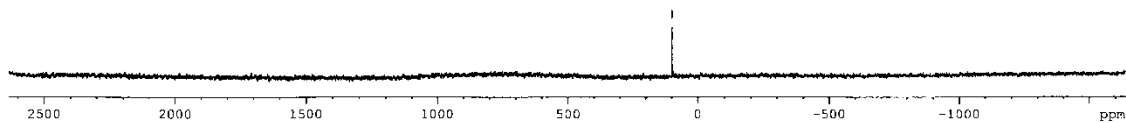

Figure 66 :  $^{77}\text{Se}$  NMR spectrum of **18**.

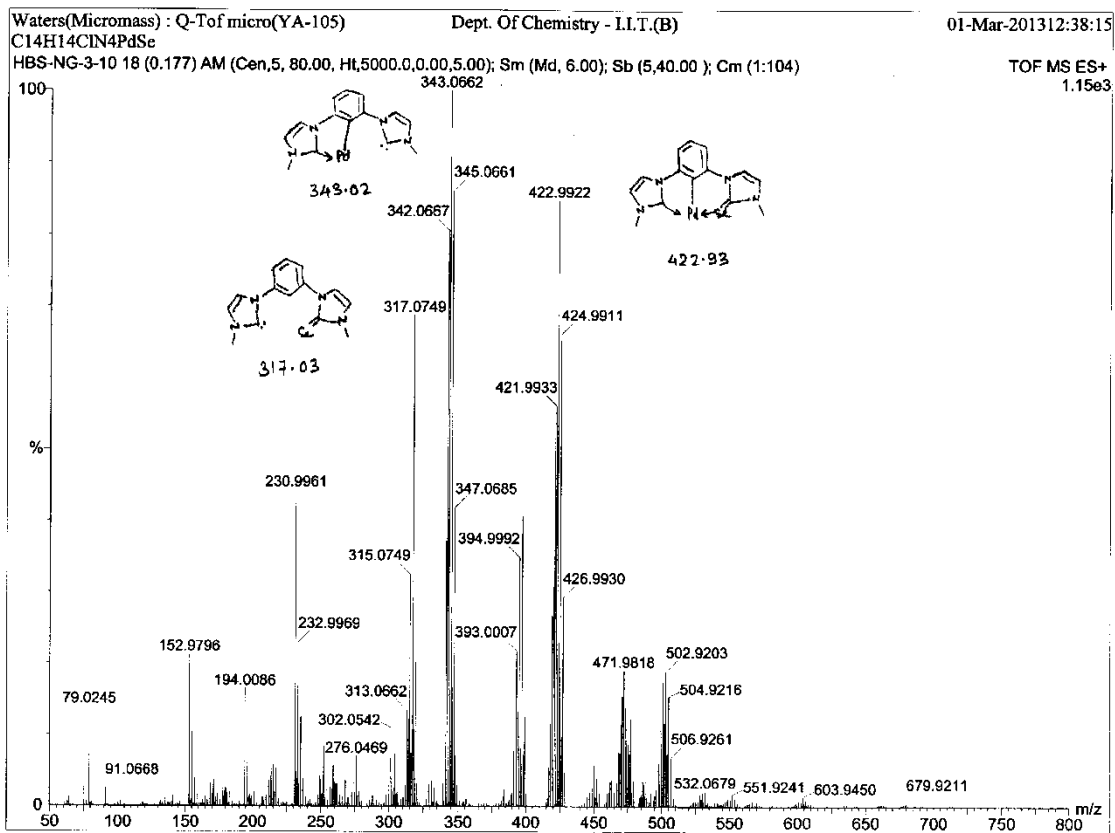

Figure 67 : Mass spectrum of 18.

HBS-NG-2-45-1H

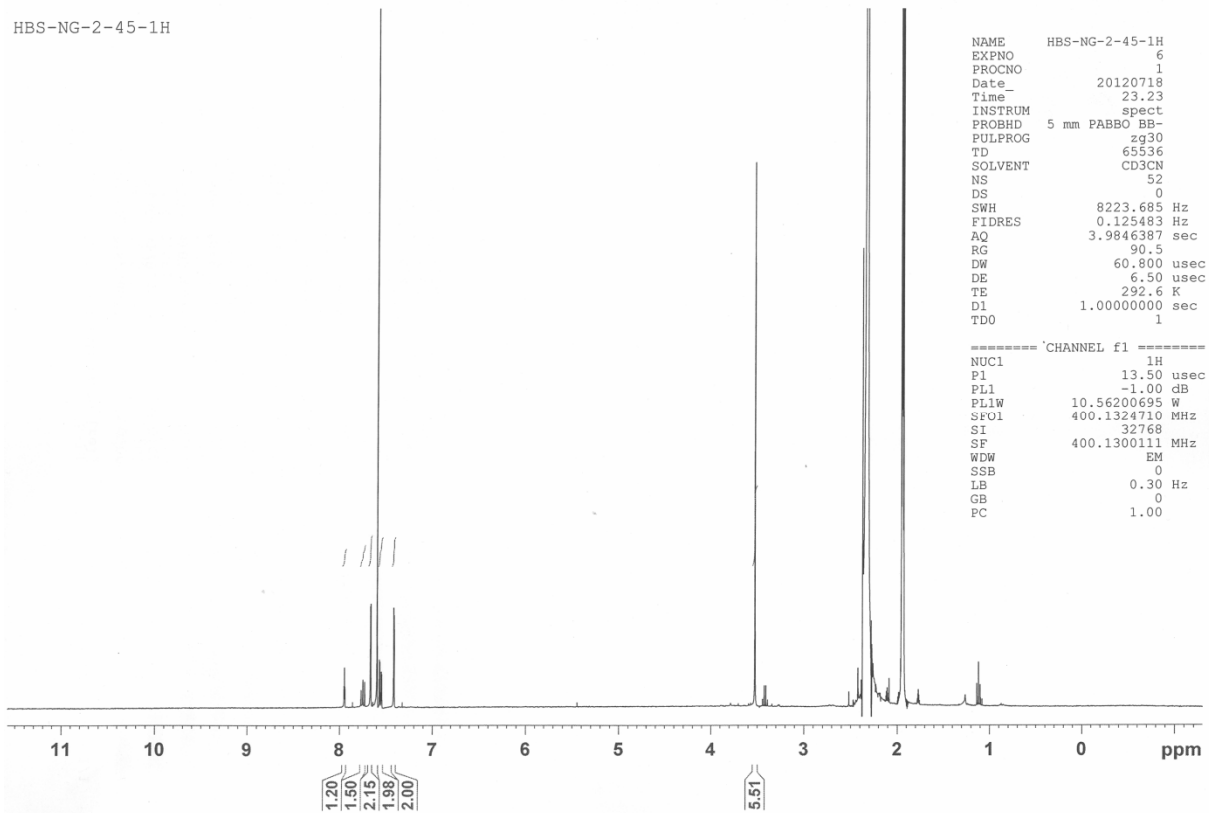

Figure 68.  $^1\text{H}$  NMR spectrum of complex **19**.

HBS-NG-2-45-19F

NAME HBS-NG-2-45-19F  
EXPNO 12  
PROCNO 1  
Date\_ 20120217  
Time 2.32  
INSTRUM spect  
PROBHD 5 mm PABBO BB-  
PULPROG zgpg30  
TD 131072  
SOLVENT CD3CN  
NS 23  
DS 4  
SWH 166666.672 Hz  
FIDRES 1.271566 Hz  
AQ 0.3932660 sec  
RG 2050  
DW 3.000 usec  
DE 6.50 usec  
TE 292.9 K  
D1 1.0000000 sec  
TD0 1

-----71.93  
-----73.81

===== CHANNEL f1 =====  
NUC1 19F  
P1 13.00 usec  
PL1 -3.00 dB  
PL1W 17.04036522 W  
SFO1 376.4979895 MHz  
SI 65536  
SF 376.4983660 MHz  
WDW EM  
SSB 0  
LB 1.00 Hz  
GB 0  
PC 1.00

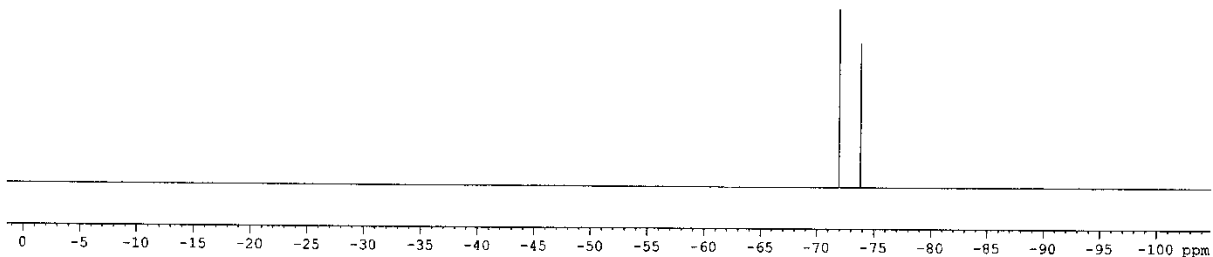

Figure 69.  $^{19}\text{F}$  NMR spectrum of complex **19**.

HBS-NG-2-45-31P

NAME HBS-NG-2-45-31P  
EXPNO 9  
PROCNO 1  
Date\_ 20120217  
Time 2.28  
INSTRUM spect  
PROBHD 5 mm PABBO BB-  
PULPROG zgpg30  
TD 65536  
SOLVENT CD3CN  
NS 56  
DS 4  
SWH 64102.563 Hz  
FIDRES 0.978127 Hz  
AQ 0.5112308 sec  
RG 2050  
DW 7.800 usec  
DE 6.50 usec  
TE 292.9 K  
D1 1.0000000 sec  
D11 0.0300000 sec  
TDC 1

===== CHANNEL f1 =====  
NUC1 31P  
P1 8.40 usec  
PL1 -1.00 dB  
PL1W 29.72541046 W  
SFO1 161.9755930 MHz

===== CHANNEL f2 =====  
CPDPRG2 waltz16  
NUC2 1H  
PCPD2 80.00 usec  
PL2 -1.00 dB  
PL12 14.50 dB  
PL13 14.50 dB  
PL2W 10.56200695 W  
PL12W 0.29767781 W  
PL13W 0.29767781 W  
SFO2 400.1316005 MHz  
SI 32768  
SF 161.9755930 MHz  
WDW EM  
SSB 0  
LB 8.00 Hz  
GB 0  
PC 1.40

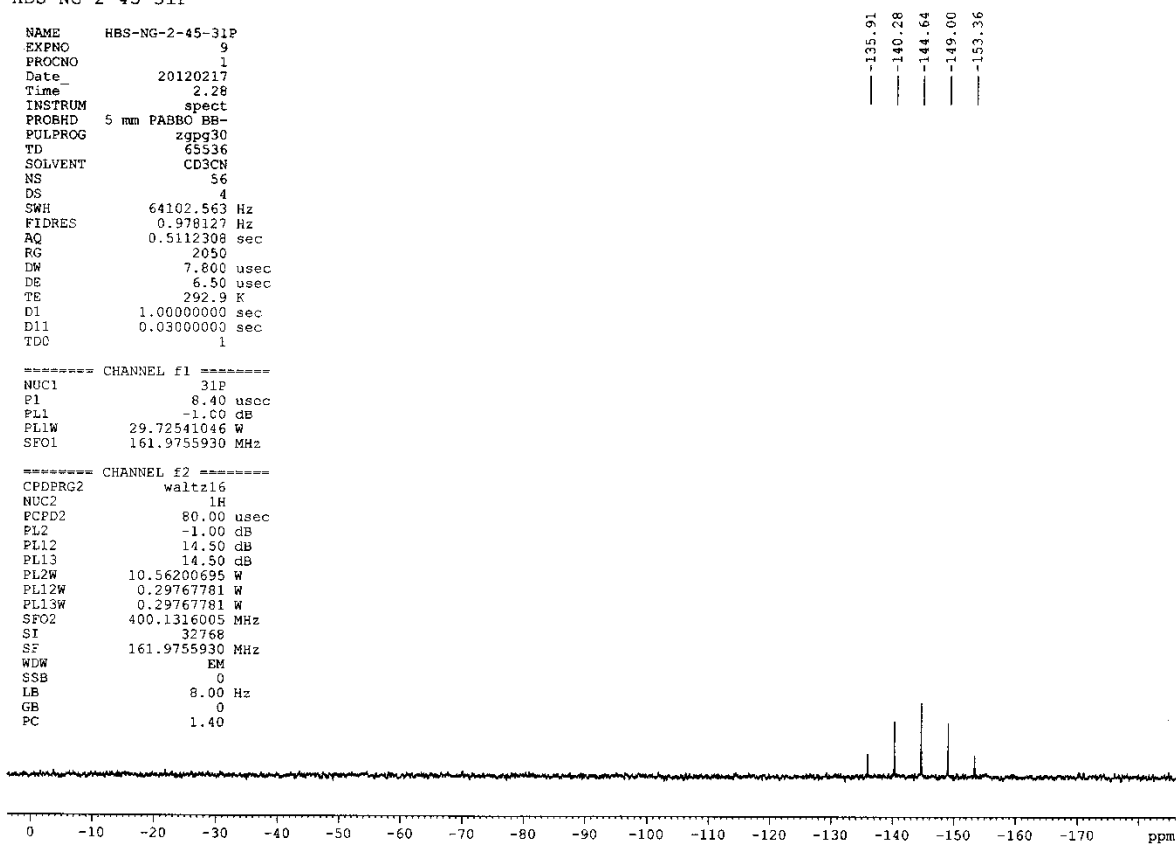

Figure 70.  $^{31}\text{P}$  NMR spectrum of complex **19**.

HBS-NG-2-45-77Se

42.815

```
NAME      HBS-NG-2-45-77Se
EXPNO     1
PROCNO    1
Date_     20120215
Time      20.41
INSTRUM   spect
PROBHD    5 mm PABBO BB-
PULPROG   zg
TD         65536
SOLVENT   CD3CN
NS        250
DS         4
SWH       326086.969 Hz
FIDRES    4.975692 Hz
AQ        0.1005385 sec
RG         64
DW        1.533 usec
DE        6.50 usec
TE        292.4 K
D1        1.0000000 sec
TDO       1
```

```
===== CHANNEL f1 =====
NUC1      77Se
P1        10.00 usec
PL1       0.00 dB
SFO1      76.3490004 MHz
SI        65536
SF        76.3110246 MHz
WDW       EM
SSB       0
LB        60.00 Hz
GB        0
PC        0.00
```

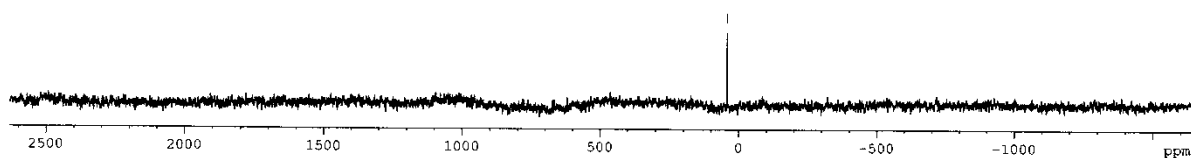

Figure 71.  $^{77}\text{Se}$  NMR spectrum of complex **19**.



# Eager 300 Report

Page: 1 Sample: NG-2-45 (NG-2-45)

Method Name : SD150612  
Method File : D:\CHNS2012\SD150612.mth  
Chromatogram : NG-2-45  
Operator ID : SHIKHA  
Analysed : 06/15/2012 13:52  
Sample ID : NG-2-45 (# 19)  
Analysis Type : UnkNown (Area)

Company Name : C.E. Instruments  
Printed : 6/15/2012 15:07  
Instrument N. : Instrument #1  
Sample weight : .843

Calib. method : using 'K Factors'

!!! Warning missing one or more peaks.

| Element Name | %       | Ret.Time | Area   | BC | Area ratio | K factor    |
|--------------|---------|----------|--------|----|------------|-------------|
| Nitrogen     | 8.7124  | 44       | 97229  | RS | 6.181736   | .132383E+07 |
| Carbon       | 28.4132 | 68       | 601044 | RS | 1.000000   | .249735E+07 |
| Hydrogen     | 2.1122  | 184      | 114035 | RS | 5.270698   | .581082E+07 |
| Totals       | 39.2377 |          | 812308 |    |            |             |

C = 28.29

H = 2.37

N = 9.43

Figure 72. Elemental analysis of 19.

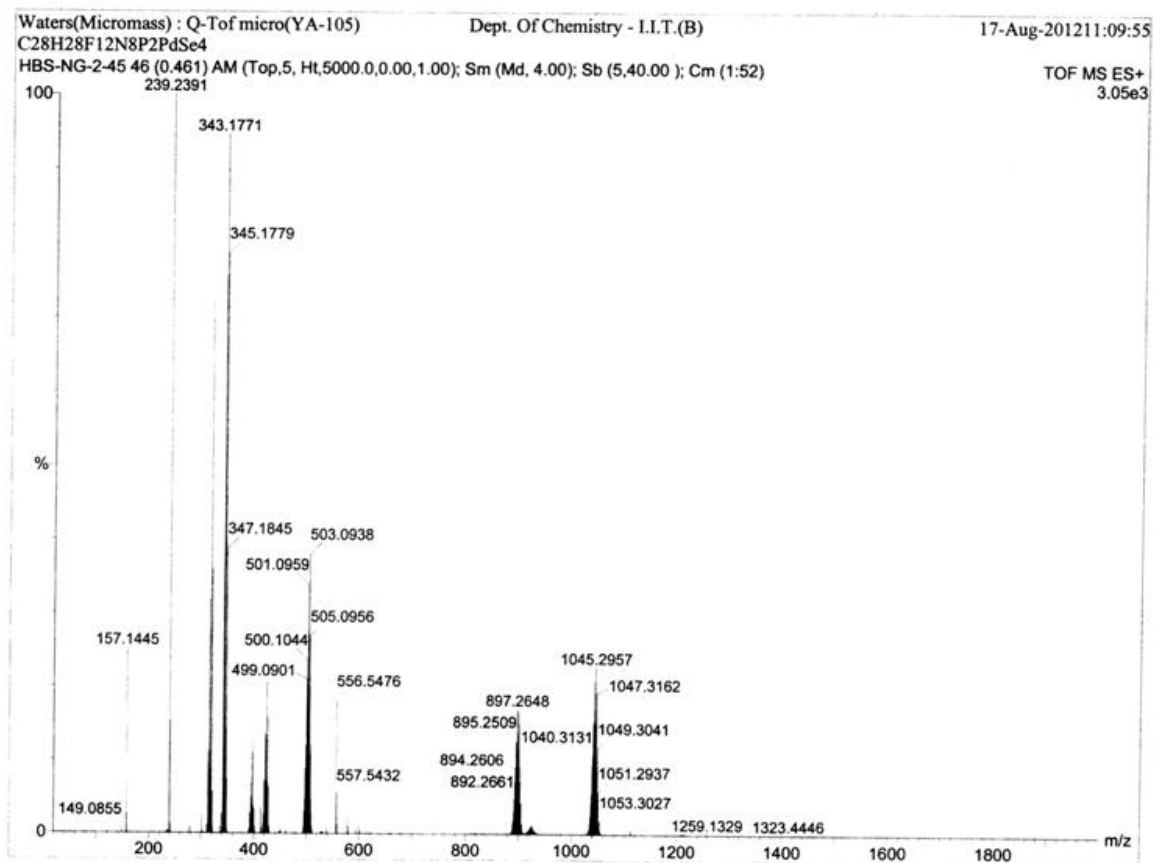

Figure 73. Mass spectrum of complex 19.

**X-ray crystallography:**

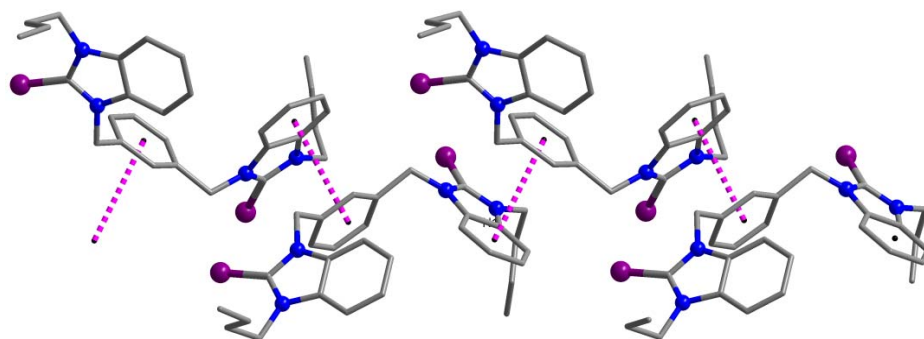

Figure 74. Packing diagram of compound **8**. Hydrogen atoms are omitted for clarity.

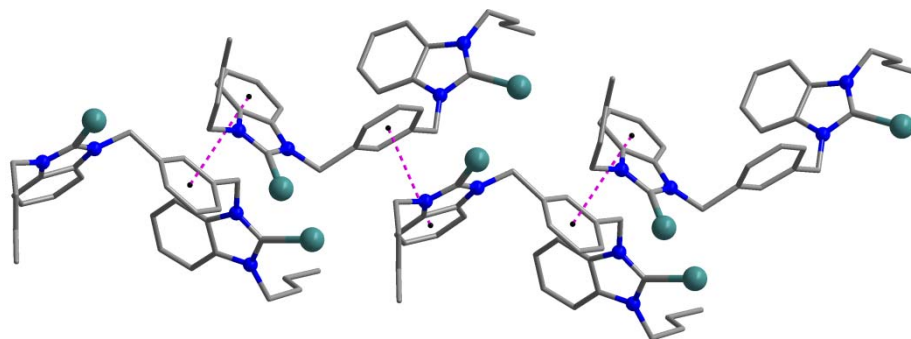

Figure 75. Packing diagram of compound **9**. Hydrogen atoms are omitted for clarity.

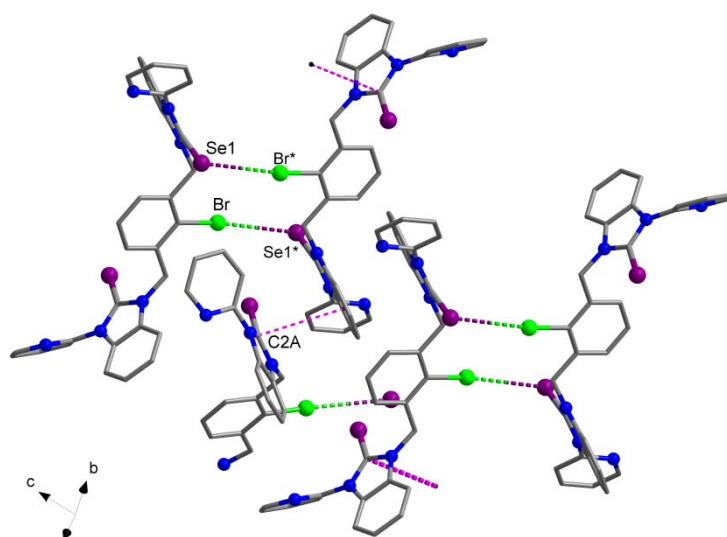

Figure 76. Packing diagram of compound **13**. Hydrogen atoms are omitted for clarity.

Table 1. Significant bond lengths [ $\text{\AA}$ ] and angles [ $^\circ$ ] for **8**, **9** and **13**.

| <b>8</b>          |            |                   |           |
|-------------------|------------|-------------------|-----------|
| Se(1)-C(1)        | 1.833(4)   | Se(2)-C(20)       | 1.842(5)  |
| N(1)-C(1)         | 1.361(5)   | N(2)-C(1)         | 1.358(5)  |
| N(3)-C(20)        | 1.352(5)   | C(20)-N(4A)       | 1.372(9)  |
| N(1)-C(1)-Se(1)   | 126.6(3)   | N(2)-C(1)-Se(1)   | 126.4(3)  |
| N(3)-C(20)-Se(2)  | 125.5(3)   | N(4B)-C(20)-Se(2) | 131.0(4)  |
| <b>9</b>          |            |                   |           |
| Te(1)-C(1)        | 2.087(10)  | Te(2)-C(20)       | 2.073(9)  |
| N(1)-C(1)         | 1.335(13)  | N(2)-C(1)         | 1.342(12) |
| N(3)-C(20)        | 1.357(10)  | N(4)-C(20)        | 1.346(13) |
| N(1)-C(1)-Te(1)   | 127.0(8)   | N(2)-C(1)-Te(1)   | 124.6(7)  |
| N(3)-C(20)-Te(2)  | 126.0(7)   | N(4)-C(20)-Te(2)  | 127.5(6)  |
| <b>13</b>         |            |                   |           |
| Se(1)-C(2B)       | 1.824(4)   | Se(2)-C(2A)       | 1.836(4)  |
| Br-C(1)           | 1.8865(16) |                   |           |
| N(1B)-C(2B)-Se(1) | 126.8(3)   | N(2B)-C(2B)-Se(1) | 126.9(3)  |
| N(1A)-C(2A)-Se(2) | 126.1(3)   | N(2A)-C(2A)-Se(2) | 127.1(3)  |

Table 2. Significant bond lengths [ $\text{\AA}$ ] and angles [ $^\circ$ ] for **18**.

|               |            |                 |            |
|---------------|------------|-----------------|------------|
| Pd-C(4)       | 2.014(4)   | N(2)-C(4)       | 1.347(6)   |
| Pd-C(10)      | 2.022(4)   | N(2)-C(3)       | 1.382(6)   |
| Pd-Se         | 2.3773(5)  | N(2)-C(5)       | 1.414(6)   |
| Pd-Cl         | 2.3967(10) | N(3)-C(13)      | 1.359(6)   |
| Se-C(13)      | 1.862(4)   | N(3)-C(9)       | 1.453(5)   |
| N(1)-C(4)     | 1.341(6)   | N(4)-C(13)      | 1.336(6)   |
| N(1)-C(1)     | 1.465(6)   | N(4)-C(14)      | 1.460(6)   |
|               |            |                 |            |
| C(4)-Pd-C(10) | 82.01(18)  | C(13)-Se-Pd     | 105.65(13) |
| C(4)-Pd-Se    | 176.36(13) | C(4)-N(2)-C(5)  | 118.9(4)   |
| C(10)-Pd-Se   | 95.91(12)  | C(13)-N(3)-C(9) | 129.7(4)   |
| C(4)-Pd-Cl    | 98.34(13)  | C(9)-C(10)-Pd   | 134.0(3)   |
| C(10)-Pd-Cl   | 178.57(12) | C(5)-C(10)-Pd   | 112.1(3)   |
| Se-Pd-Cl      | 83.68(3)   |                 |            |

Table 3. Significant bond lengths [ $\text{\AA}$ ] and angles [ $^\circ$ ] for **19**.

|                    |            |                  |            |
|--------------------|------------|------------------|------------|
| Pd-Se(1)           | 2.4508(5)  | N(1)-C(1)        | 1.336(7)   |
| Pd-Se(1)#1         | 2.4508(5)  | N(1)-C(2)        | 1.479(7)   |
| Pd-Se(2)#1         | 2.4553(5)  | N(2)-C(1)        | 1.360(7)   |
| Pd-Se(2)           | 2.4553(5)  | N(3)-C(13)       | 1.368(6)   |
| Se(1)-C(1)         | 1.879(5)   | N(4)-C(13)       | 1.341(6)   |
| Se(2)-C(13)        | 1.877(5)   | N(4)-C(14)       | 1.467(7)   |
|                    |            |                  |            |
| Se(1)-Pd-Se(1)#1   | 180.000(1) | C(1)-Se(1)-Pd    | 101.33(15) |
| Se(1)-Pd-Se(2)#1   | 91.496(18) | C(13)-Se(2)-Pd   | 103.41(14) |
| Se(1)#1-Pd-Se(2)#1 | 88.504(18) | C(1)-N(1)-C(2)   | 124.9(5)   |
| Se(1)-Pd-Se(2)     | 88.504(18) | C(13)-N(4)-C(14) | 125.7(4)   |
| Se(1)#1-Pd-Se(2)   | 91.496(18) | N(1)-C(1)-N(2)   | 106.9(4)   |
| Se(2)#1-Pd-Se(2)   | 180.0      | N(4)-C(13)-N(3)  | 106.6(4)   |
